# Supplementary material for: Are (Co)Polymers of 1,1,3,3,3-Pentafluoropropene Possible?
Source: MDPI journal article supplement (doi:10.3390/molecules28124618), 2023-06-07
Supplement: s1 [file s1]

# SUPPORTING INFORMATION

## Are (co)polymers of 1,1,3,3,3-pentafluoropropene possible?

*Frédéric Boschet, Georgi Kostov, Hristina Raynova, Bruno Ameduri\**

Institut Charles Gerhardt, CNRS, ENSCM, Montpellier, France

[bruno.ameduri@enscm.fr](mailto:bruno.ameduri@enscm.fr)

|                                                                                                                                                                                                          |    |
|----------------------------------------------------------------------------------------------------------------------------------------------------------------------------------------------------------|----|
| Figure S1: expansion of the 0.8-3.6 ppm zone in the $^1\text{H}$ NMR spectrum of poly(PFP- <i>co</i> -VDF) recorded in acetone- $\text{d}_6$ . (Run No 1 in Table 1). .....                              | 3  |
| Figure S2: expansion of the -59 to -76 ppm zone in the $^{19}\text{F}$ NMR spectrum of poly(PFP- <i>co</i> -MAF-TBE) recorded in acetone- $\text{d}_6$ . (Run No 5 in Table 1). .....                    | 4  |
| Figure S3: $^1\text{H}$ NMR spectrum of poly(PFP- <i>co</i> -MAF-TBE) recorded in acetone- $\text{d}_6$ . (Run No 5 in Table 1). .....                                                                   | 5  |
| Figure S4: $^{19}\text{F}$ NMR spectrum of poly(PFP- <i>co</i> -HFP) recorded in acetone- $\text{d}_6$ (Run No 2, Table 2). .....                                                                        | 6  |
| Figure S5: $^{19}\text{F}$ NMR spectrum of poly(PFP- <i>co</i> -PMVE) cooligomer recorded in acetone- $\text{d}_6$ (Run No 7, Table 2). .....                                                            | 7  |
| Figure S6: $^1\text{H}$ NMR spectrum of poly(PFP- <i>co</i> -PMVE) cooligomer recorded in acetone- $\text{d}_6$ . (Run No 7 in Table 2). .....                                                           | 8  |
| Figure S7: $^{19}\text{F}$ NMR spectrum of poly(PFP- <i>co</i> -TFP) cooligomer recorded in acetone- $\text{d}_6$ (Run No 9, Table 2). .....                                                             | 9  |
| Figure S8: $^1\text{H}$ NMR spectrum of poly(PFP- <i>co</i> -TFP) cooligomer recorded in acetone- $\text{d}_6$ . (Run No 9 in Table 2). .....                                                            | 10 |
| Figure S9: $^{19}\text{F}$ NMR spectrum of poly(PFP- <i>co</i> -CTFE) copolymer recorded in acetone- $\text{d}_6$ (Run No 1, Table 4). .....                                                             | 11 |
| Figure S10: expansion of the zone between 1.2 to 3.8 ppm in the $^1\text{H}$ NMR spectrum of poly(PFP- <i>co</i> -CTFE) copolymer recorded in acetone- $\text{d}_6$ . (Run No 1 in Table 4). .....       | 12 |
| Figure S11: expansion of the zone between -65 to -120 ppm in the $^{19}\text{F}$ NMR spectrum of poly(VDF- <i>co</i> -MAFTBE) copolymer recorded in acetone- $\text{d}_6$ . (Run No 3 in Table 3). ..... | 13 |

|                                                                                                                                                                                                                                                            |    |
|------------------------------------------------------------------------------------------------------------------------------------------------------------------------------------------------------------------------------------------------------------|----|
| Figure S12: $^1\text{H}$ NMR spectrum of poly(VDF- <i>co</i> -MAF-TBE) copolymer recorded in acetone- $\text{d}_6$ . (Run No 3 in Table 3).....                                                                                                            | 14 |
| Figure S 13: $^{19}\text{F}$ NMR spectrum of poly(VDF- <i>co</i> -HFP) copolymer recorded in acetone- $\text{d}_6$ . (Run No 3 in Table 2). ....                                                                                                           | 15 |
| Figure S14: $^1\text{H}$ NMR spectrum of poly(VDF- <i>co</i> -HFP) copolymer recorded in acetone- $\text{d}_6$ . (Run No 3 in Table 2). ....                                                                                                               | 16 |
| Figure S15: Expansion of the 0.8-3.4 ppm zone in the $^1\text{H}$ NMR spectrum of poly(PFP- <i>ter</i> -VDF- <i>ter</i> -MAF-TBE) terpolymers (recorded in acetone- $\text{d}_6$ ) (Run 6-10 in Table 3) .....                                             | 17 |
| Figure S16: expansion of the 0.9-3.9 ppm zone of the $^1\text{H}$ NMR spectrum of poly(PFP- <i>ter</i> -VDF- <i>ter</i> -HFP) terpolymer recorded in acetone- $\text{d}_6$ (Run No 5, Table2 ).....                                                        | 18 |
| Figure S17: $^1\text{H}$ NMR spectrum of poly(PFP- <i>ter</i> -VDF- <i>ter</i> -PMVE) terpolymer (recorded in acetone $\text{d}_6$ ) (Run 8 in Table 2). ....                                                                                              | 19 |
| Figure S18: $^{19}\text{F}$ NMR spectrum of poly(PFP- <i>ter</i> -VDF- <i>ter</i> -TFP) terpolymer (recorded in acetone $\text{d}_6$ ) (Run 10 in Table 2).....                                                                                            | 20 |
| Figure S19: $^1\text{H}$ NMR spectrum of poly(PFP- <i>ter</i> -VDF- <i>ter</i> -TFP) terpolymer (recorded in acetone $\text{d}_6$ ) (Run 10 in Table 2).....                                                                                               | 21 |
| Figure S20: $^{19}\text{F}$ NMR spectrum of poly(PFP- <i>ter</i> -CTFE- <i>ter</i> -mTMI) terpolymer (recorded in acetone $\text{d}_6$ ) (Run 3 in Table 4).....                                                                                           | 22 |
| Figure S21: expansion of the 0.6 to 4.0 zone in the $^1\text{H}$ NMR spectrum of poly(PFP- <i>ter</i> -CTFE- <i>ter</i> -mTMI) terpolymer (recorded in acetone $\text{d}_6$ ) (Run 3 in Table 4).....                                                      | 23 |
| Figure S22: $^{19}\text{F}$ NMR spectrum of poly(PFP- <i>ter</i> -CTFE- <i>ter</i> -VDF) terpolymer (recorded in acetone $\text{d}_6$ ) (Run 2 in Table 4).....                                                                                            | 24 |
| Figure S23: $^1\text{H}$ NMR spectrum of poly(PFP- <i>ter</i> -CTFE- <i>ter</i> -VDF) terpolymer, recorded in recorded in acetone $\text{d}_6$ ) (Run 2 in Table 4) .....                                                                                  | 25 |
| Figure S24: $^1\text{H}$ NMR spectrum of poly(PFP- <i>ter</i> -CTFE- <i>ter</i> -VCA) terpolymer (recorded in acetone $\text{d}_6$ ) (Run 4 in Table 4) .....                                                                                              | 26 |
| Figure S25: $^{19}\text{F}$ NMR spectrum of poly(PFP- <i>ter</i> -CTFE- <i>ter</i> -EVE) terpolymer (recorded in acetone $\text{d}_6$ ) (Run 5 in Table 4).....                                                                                            | 27 |
| Figure S26: $^1\text{H}$ NMR spectrum of poly(PFP- <i>ter</i> -CTFE- <i>ter</i> -EVE) terpolymer (recorded in acetone $\text{d}_6$ ) (Run 5 in Table4) .....                                                                                               | 28 |
| Figure S27: GPC chromatogram (Solvent THF, PMMA standards) of poly (PFP- <i>ter</i> -VDF- <i>ter</i> -MAF-TBE) terpolymers. The run numbers correspond to experiment numbers in Table 3....                                                                | 29 |
| Figure S28: GPC chromatograms of co- and ter-polymers based on PFP, VDF and HFP .....                                                                                                                                                                      | 30 |
| Figure S29: TGA thermograms under nitrogen of PFP/VDF, PFP/MAF-TBE, VDF/MAF-TBE copolymers. The number of the experiments of the caption corresponds to the number of experiments in Tables 1 and 3 .....                                                  | 31 |
| Figure S30: TGA thermograms under air of poly(PFP- <i>co</i> -VDF), poly(PFP- <i>co</i> -MAF-TBE), and poly(VDF- <i>co</i> -MAF-TBE) copolymers. The number of the experiments of the caption corresponds to the number of experiments in Tables 2-3. .... | 32 |
| Figure S31: TGA thermograms under nitrogen of poly(PFP- <i>ter</i> -VDF- <i>ter</i> -MAF-TBE) terpolymers. The number of the experiments of the caption corresponds to the number of experiments in Table 1. ....                                          | 33 |
| Figure S32: TGA thermograms under air of poly(PFP- <i>ter</i> -VDF- <i>ter</i> -MAF-TBE) terpolymers. The number of the experiments of the caption corresponds to the number of experiments in Table 1.....                                                | 34 |
| Figure S33: TGA thermograms under air of poly(PFP- <i>ter</i> -VDF- <i>ter</i> -HFP), co- and ter-polymers (Table 2). ....                                                                                                                                 | 35 |

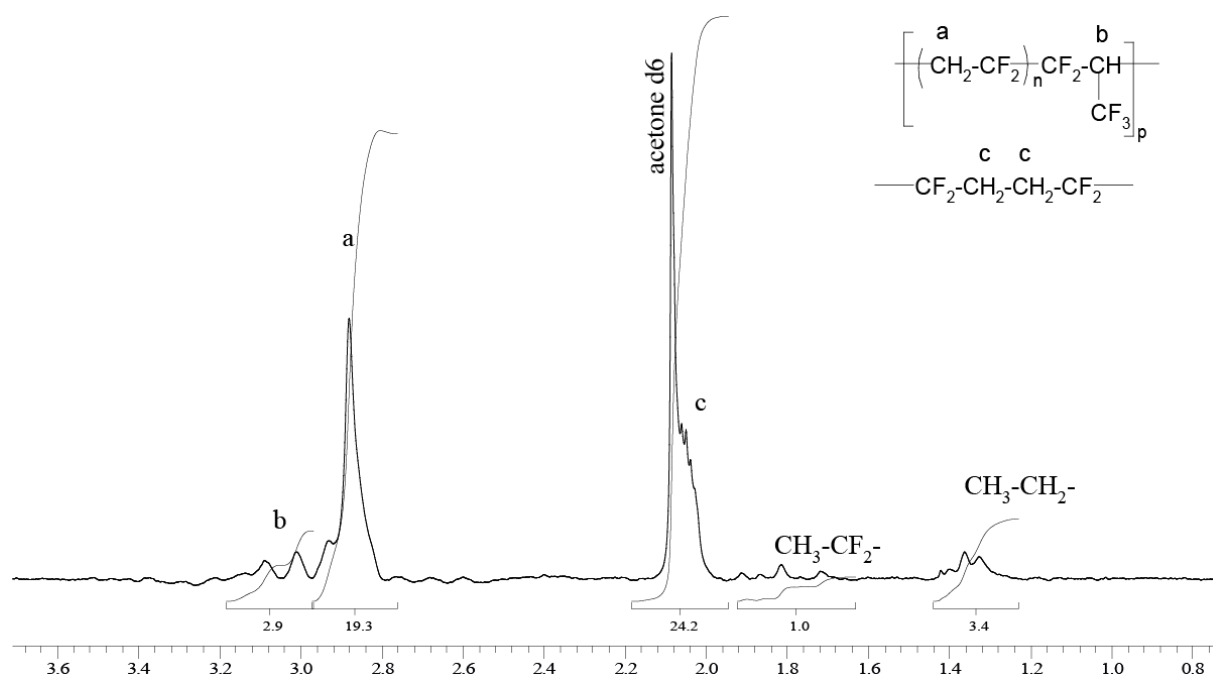

**Figure S1: expansion of the 0.8-3.6 ppm zone in the  $^1\text{H}$  NMR spectrum of poly(PFP-co-VDF) recorded in acetone- $\text{d}_6$ . (Run No 1 in Table 1).**

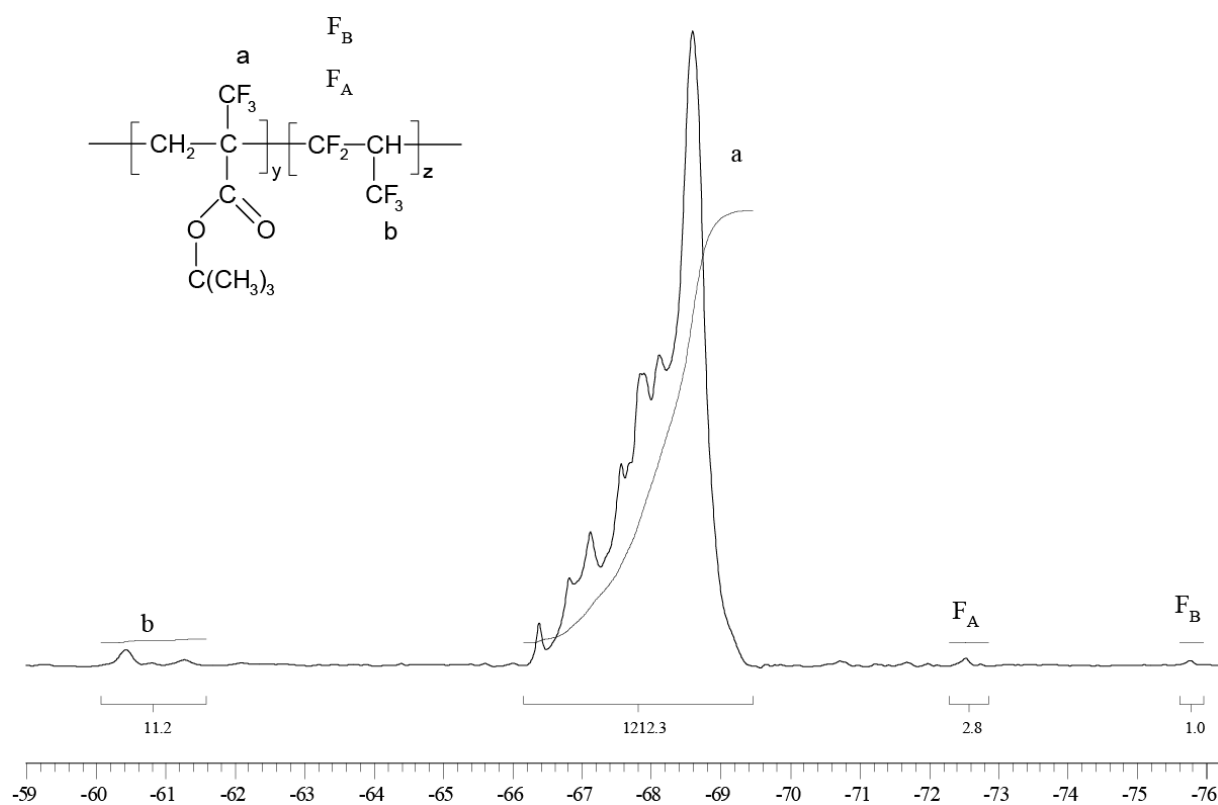

**Figure S2:** expansion of the -59 to -76 ppm zone in the  $^{19}\text{F}$  NMR spectrum of poly(PFP-co-MAF-TBE) recorded in acetone- $\text{d}_6$ . (Run No 5 in Table 1).

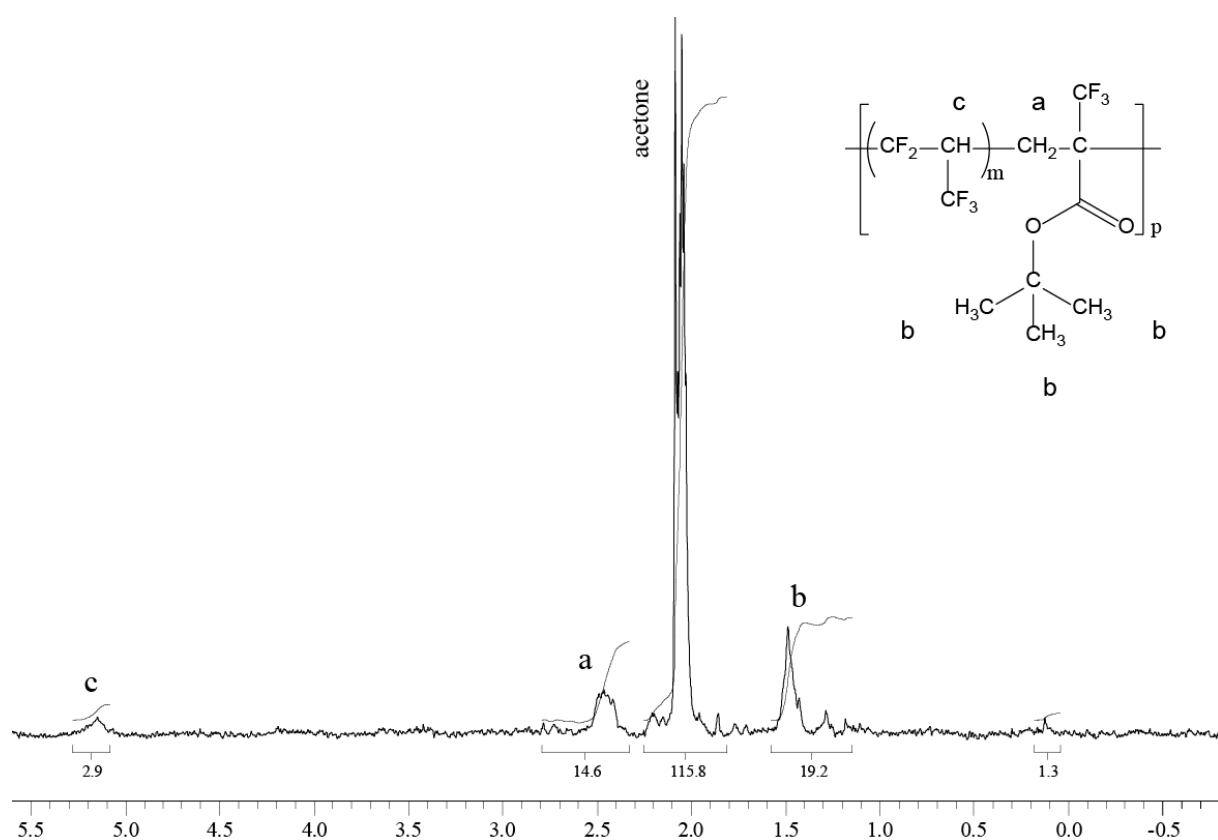

**Figure S3:  $^1\text{H}$  NMR spectrum of poly(PFP-co-MAF-TBE) recorded in acetone- $\text{d}_6$ . (Run No 5 in Table 1).**

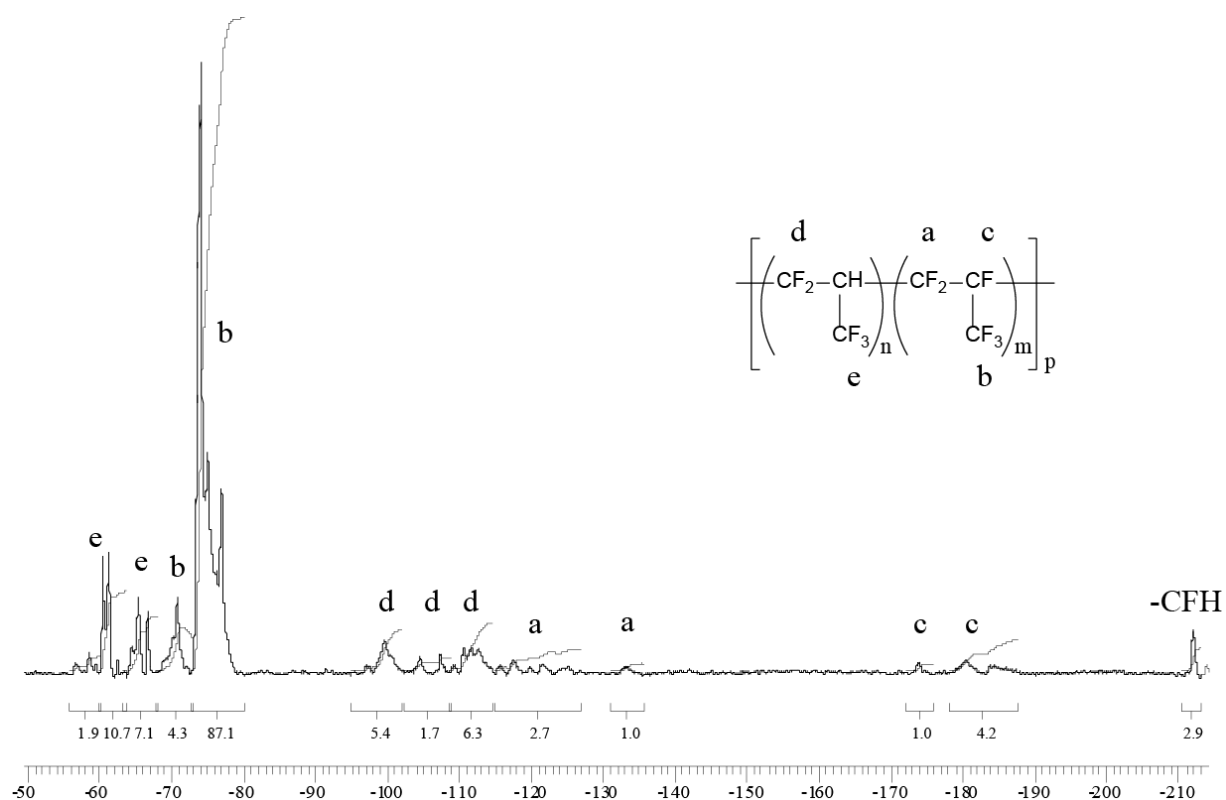

**Figure S4:**  $^{19}\text{F}$  NMR spectrum of poly(PFP-co-HFP) recorded in acetone- $\text{d}_6$  (Run No 2, Table 2)

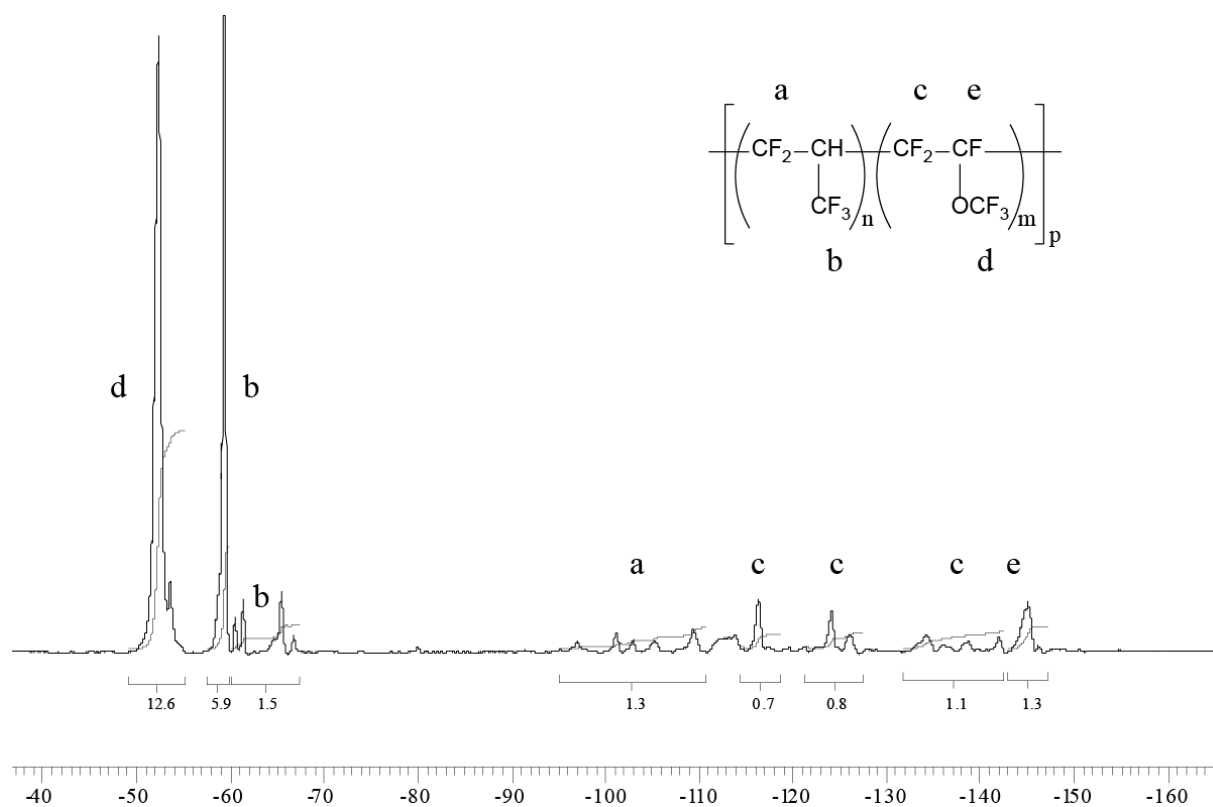

**Figure S5: <sup>19</sup>F NMR spectrum of poly(PFP-*co*-PMVE) cooligomer recorded in acetone-*d*<sub>6</sub> (Run No 7, Table 2)**

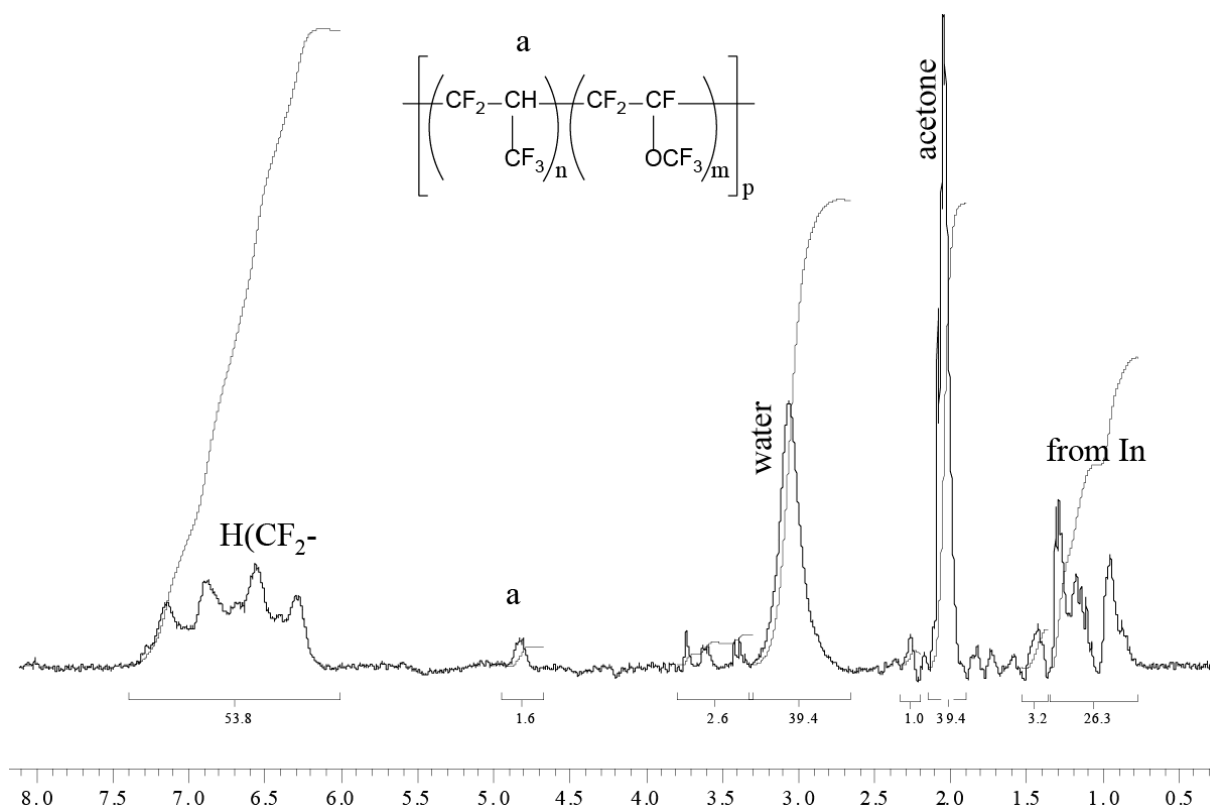

**Figure S6:  $^1\text{H}$  NMR spectrum of poly(PFP-co-PMVE) cooligomer recorded in acetone- $\text{d}_6$ . (Run No 7 in Table 2).**



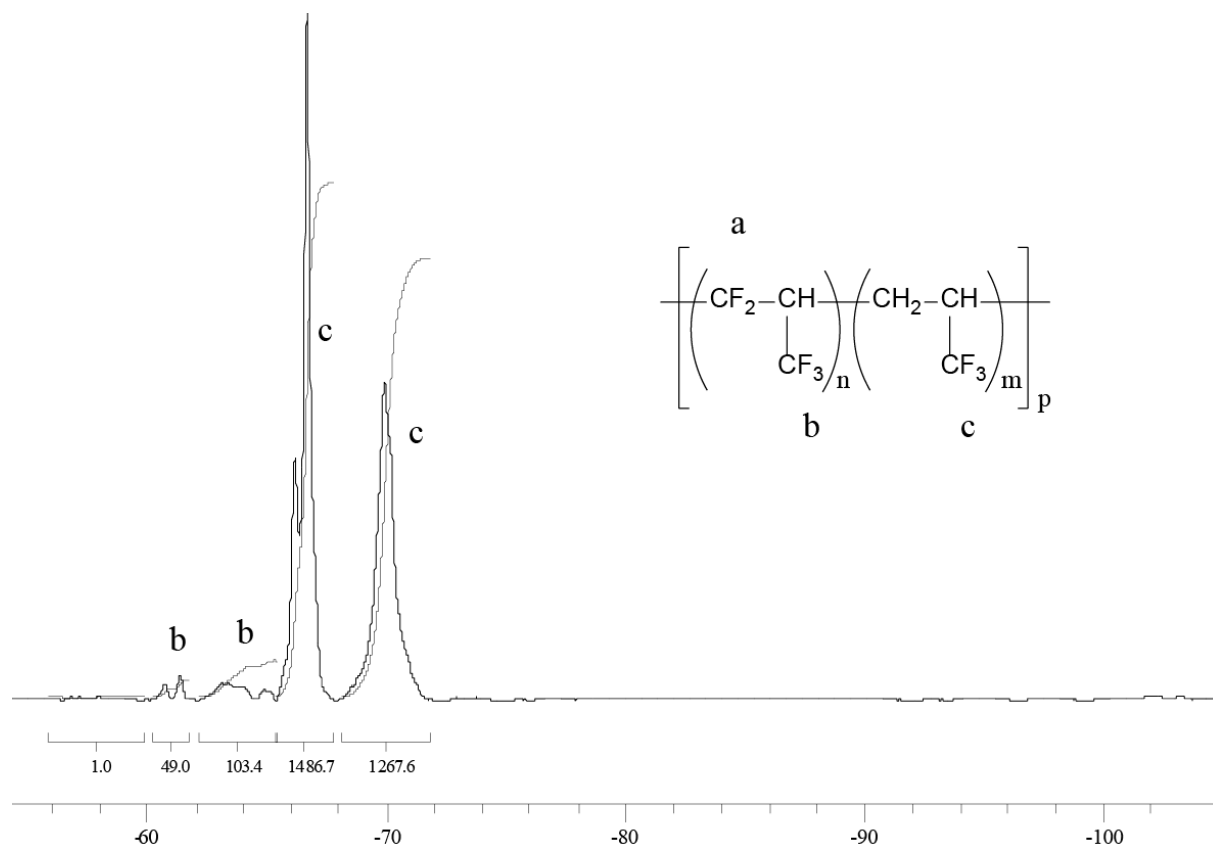

**Figure S7:  $^{19}\text{F}$  NMR spectrum of poly(PFP-co-TFP) cooligomer recorded in acetone-d<sub>6</sub> (Run No 9, Table 2)**

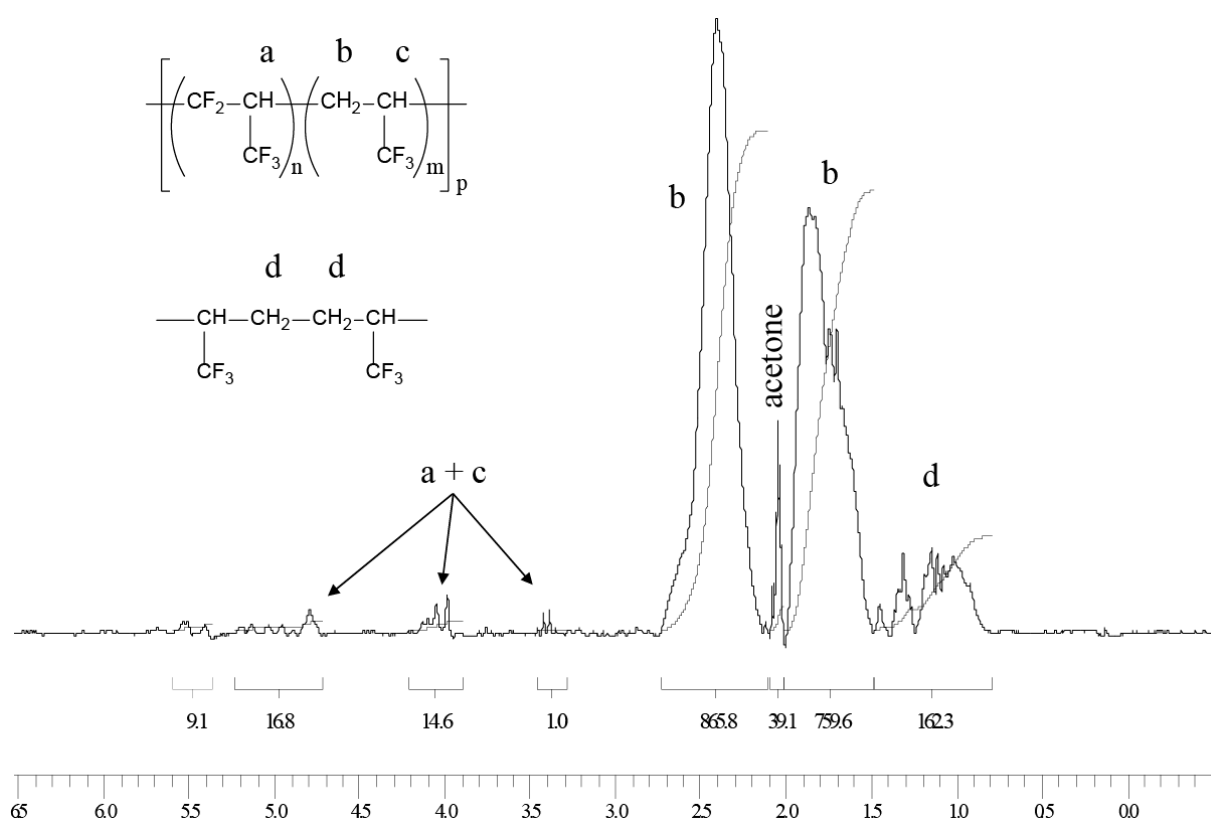

**Figure S8: <sup>1</sup>H NMR spectrum of poly(PFP-co-TFP) cooligomer recorded in acetone-d<sub>6</sub>. (Run No 9 in Table 2).**

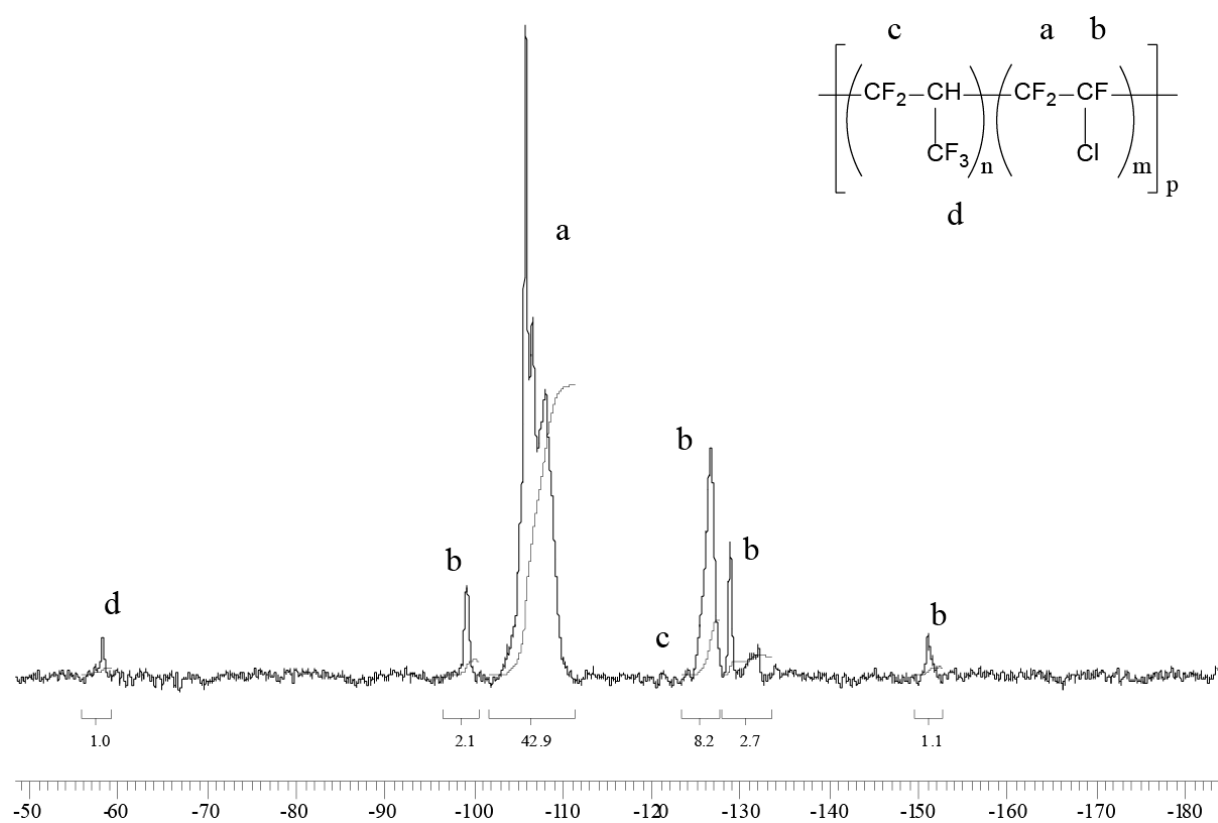

**Figure S9: <sup>19</sup>F NMR spectrum of poly(PFP-*co*-CTFE) copolymer recorded in acetone-d<sub>6</sub> (Run No 1, Table 4)**

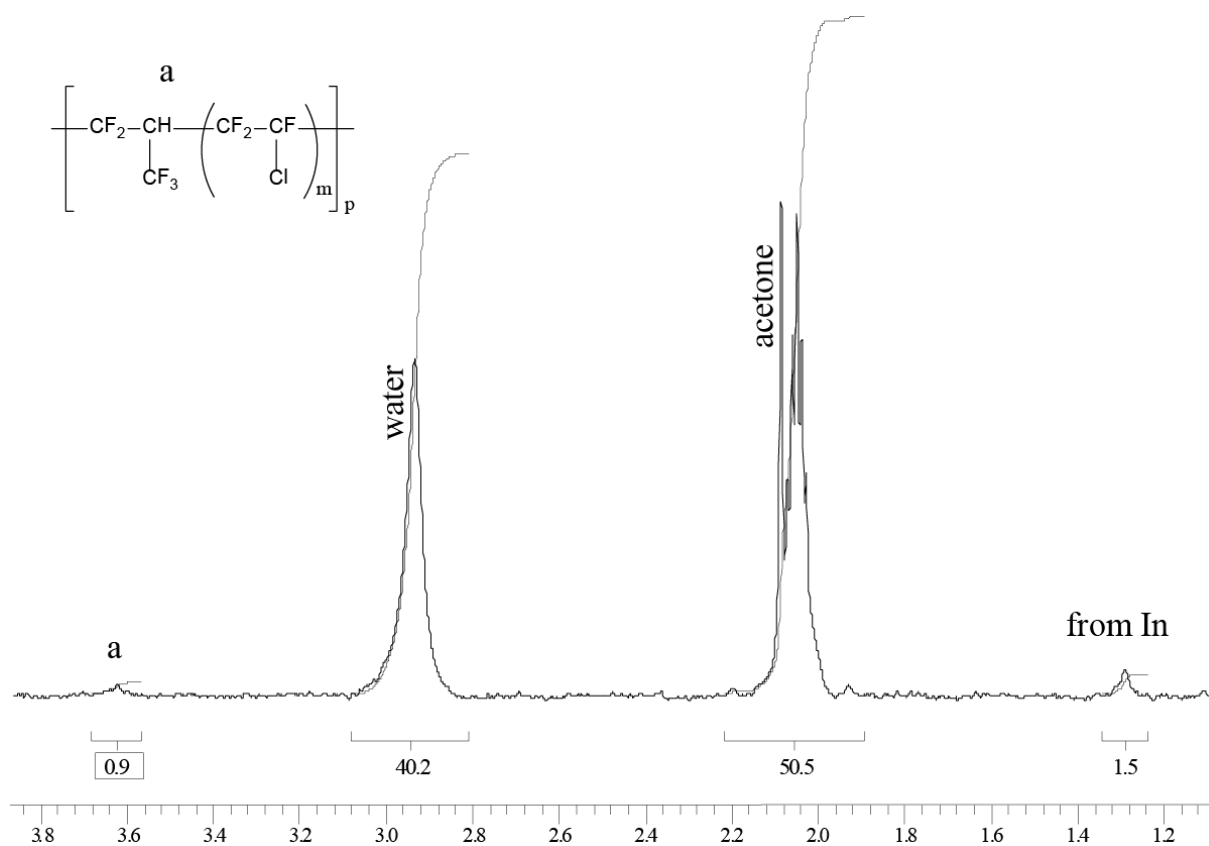

**Figure S10:** expansion of the zone between 1.2 to 3.8 ppm in the  $^1\text{H}$  NMR spectrum of poly(PFP-*co*-CTFE) copolymer recorded in acetone- $\text{d}_6$ . (Run No 1 in Table 4).

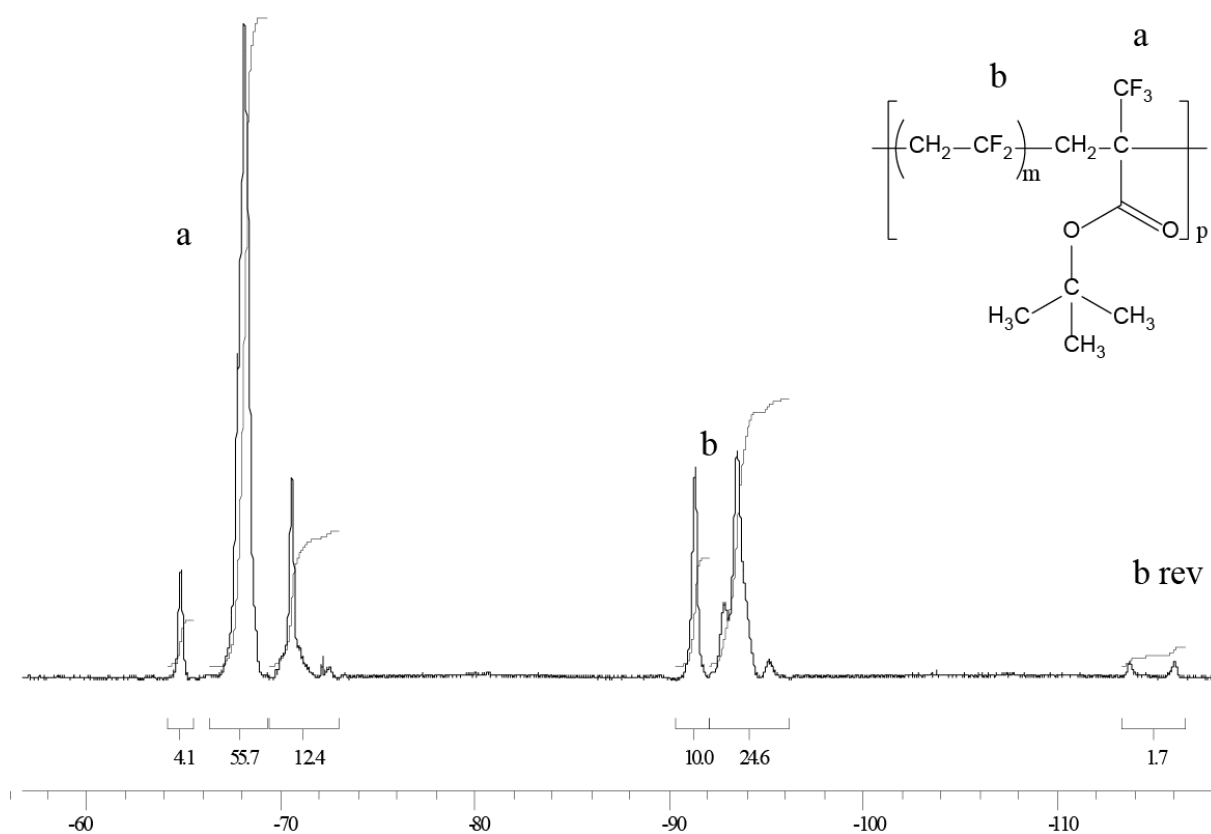

**Figure S11: expansion of the zone between -65 to -120 ppm in the  $^{19}\text{F}$  NMR spectrum of poly(VDF-*co*-MAFTBE) copolymer recorded in acetone- $\text{d}_6$ . (Run No 3 in Table 3).**

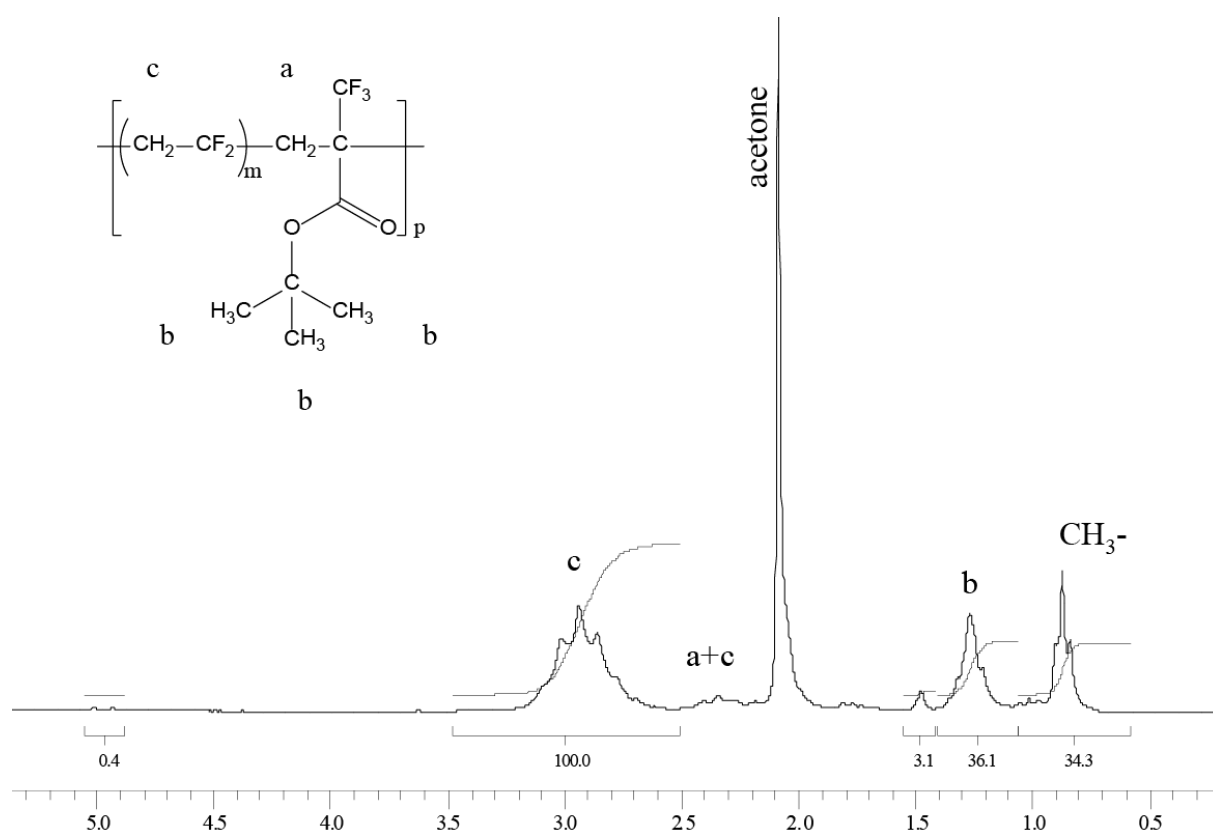

**Figure S12:** <sup>1</sup>H NMR spectrum of poly(VDF-*co*-MAF-TBE) copolymer recorded in acetone-d<sub>6</sub>. (Run No 3 in Table 3).

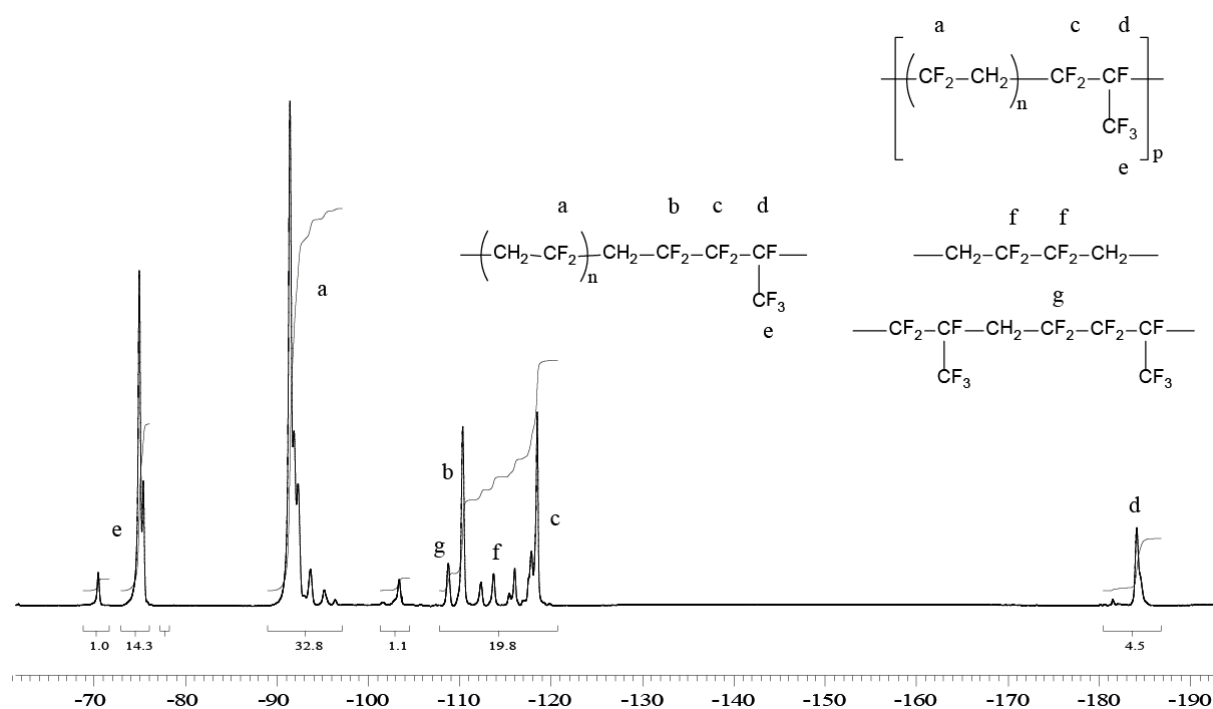

**Figure S13:**  $^{19}\text{F}$  NMR spectrum of poly(VDF-co-HFP) copolymer recorded in acetone- $\text{d}_6$ . (Run No 3 in Table 2).

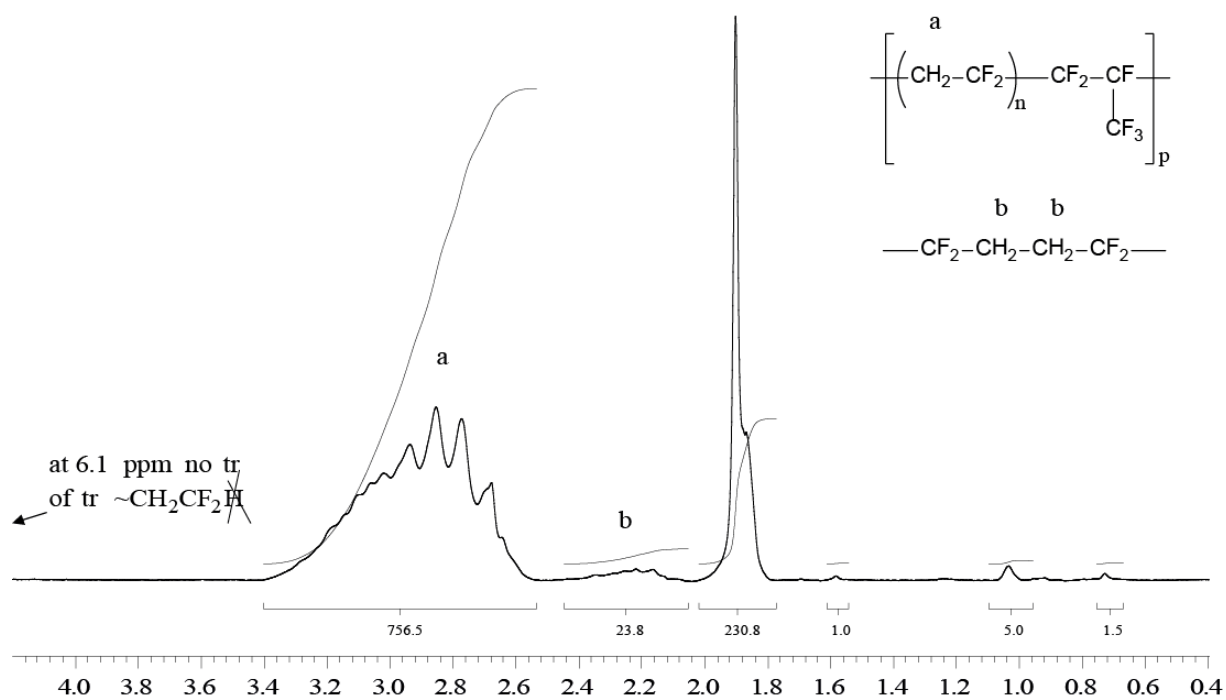

**Figure S14:**  $^1\text{H}$  NMR spectrum of poly(VDF-*co*-HFP) copolymer recorded in acetone- $\text{d}_6$ . (Run No 3 in Table 2).



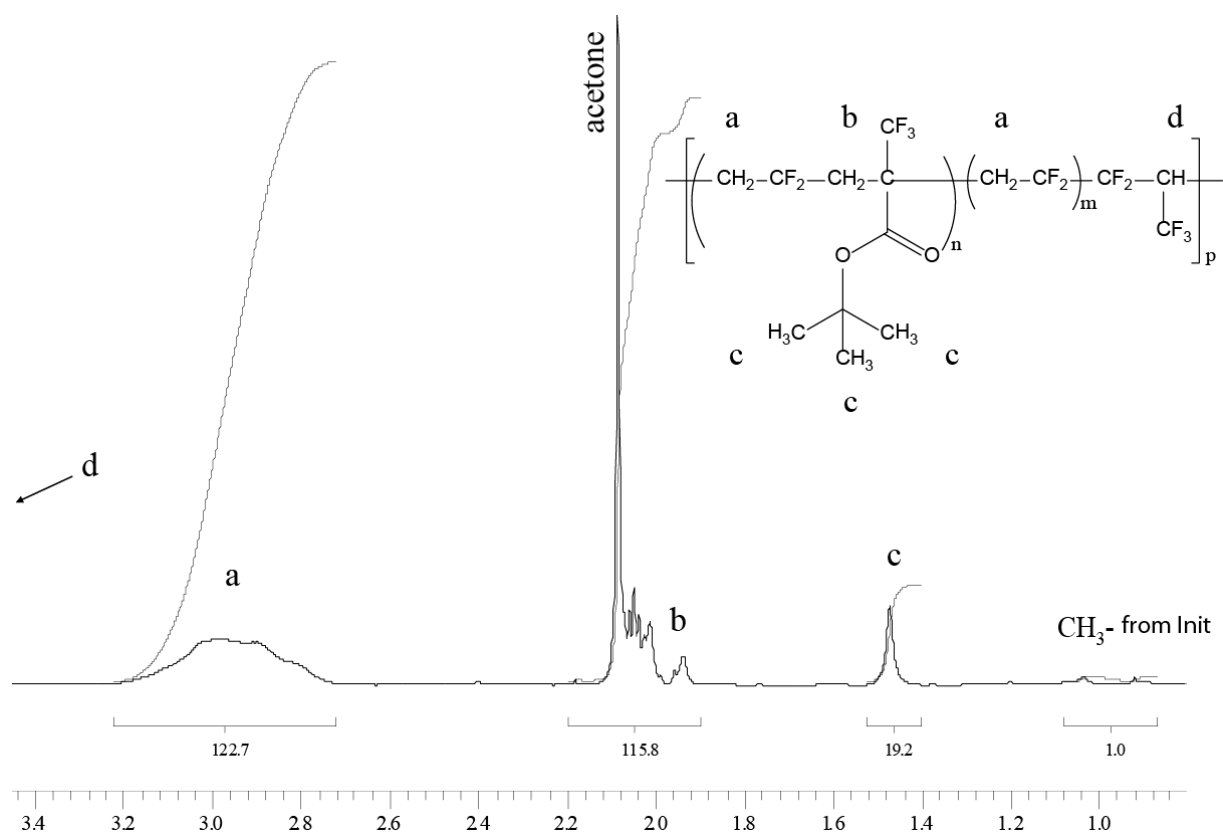

**Figure S15:** Expansion of the 0.8-3.4 ppm zone in the  $^1\text{H}$  NMR spectrum of poly(PFP-*ter*-VDF-*ter*-MAF-TBE) terpolymers (recorded in acetone- $\text{d}_6$ ) (Runs 6-10 in Table 3)

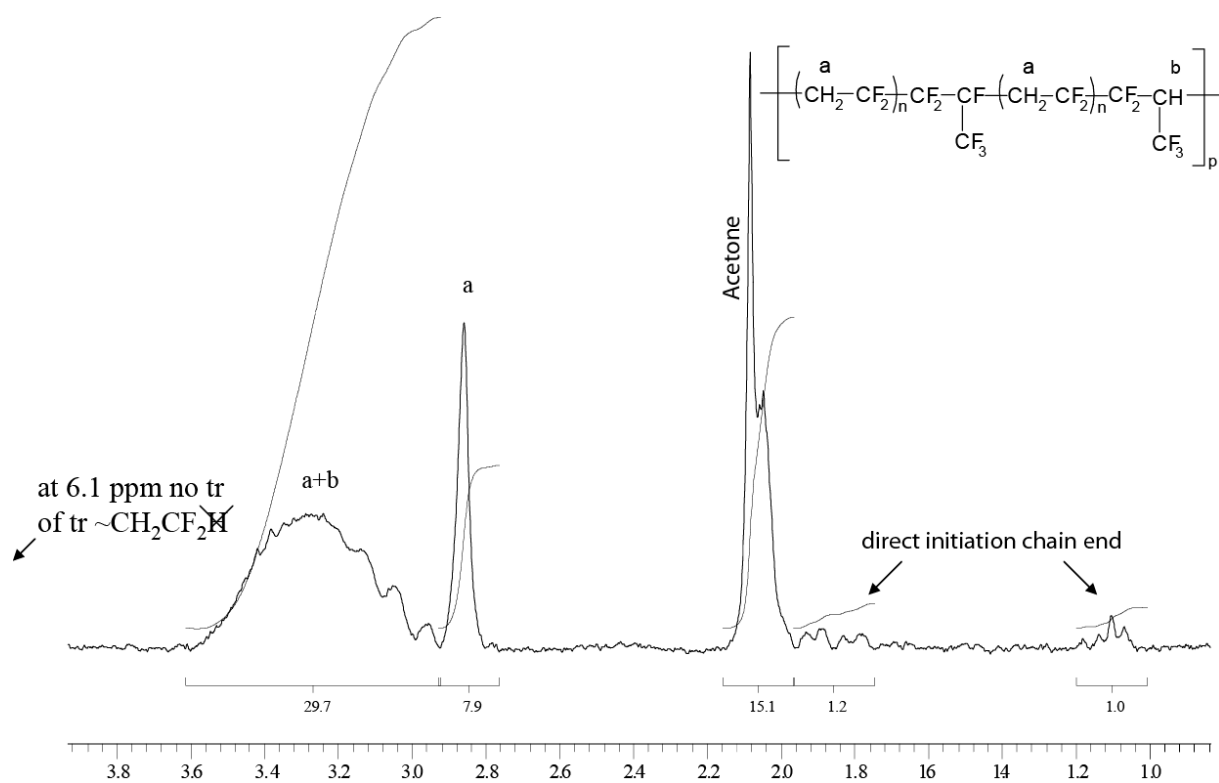

**Figure S16: expansion of the 0.9-3.9 ppm zone of the  $^1\text{H}$  NMR spectrum of poly(PFP-*ter*-VDF-*ter*-HFP) terpolymer recorded in acetone- $\text{d}_6$  (Run No 5, Table2 )**

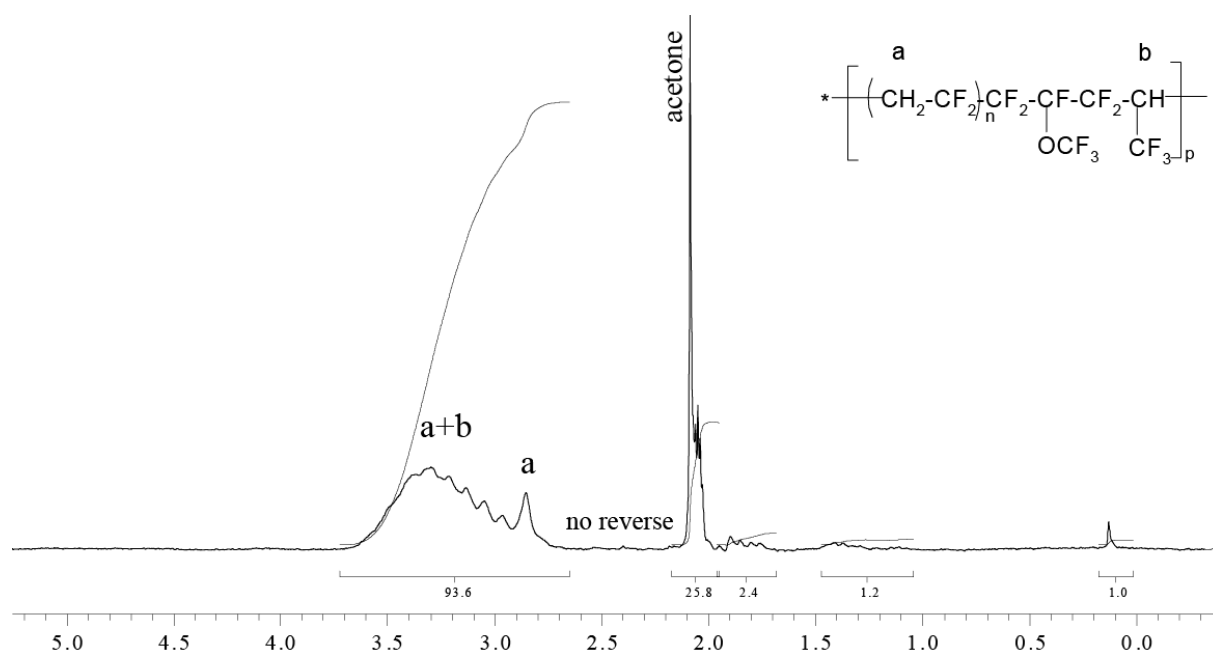

**Figure S17:**  $^1\text{H}$  NMR spectrum of poly(PFP-*ter*-VDF-*ter*-PMVE) terpolymer (recorded in acetone  $\text{d}_6$ ) (Run 8 in Table 2).

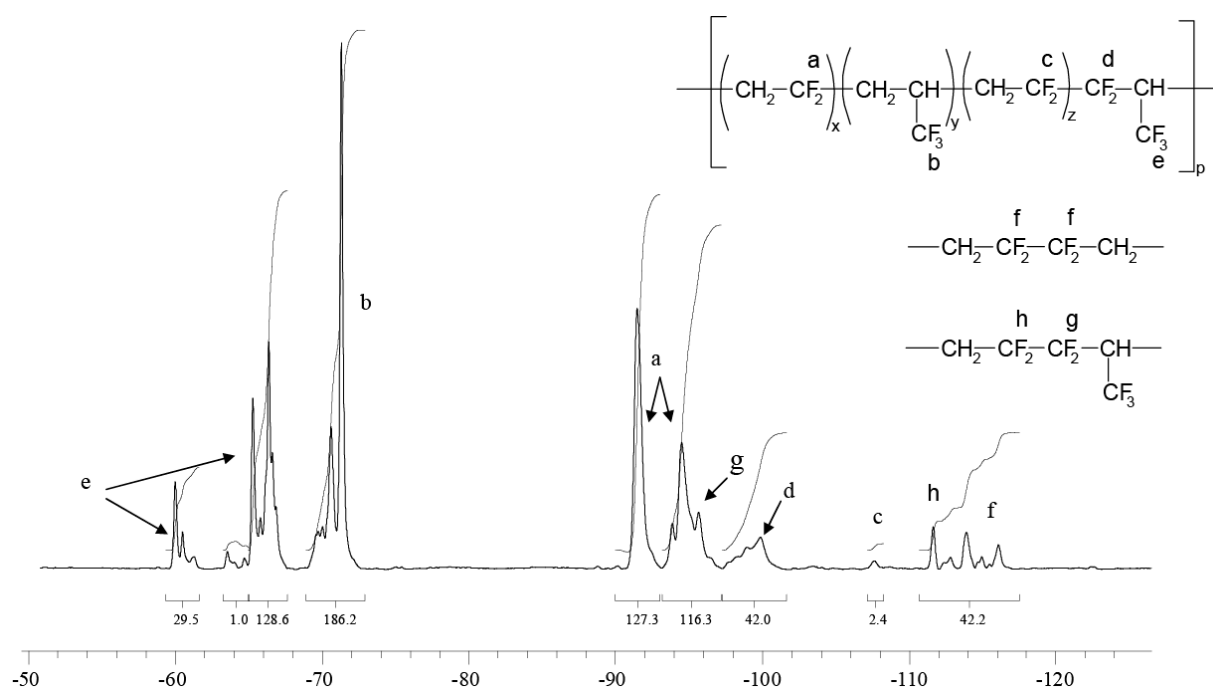

**Figure S18:**  $^{19}\text{F}$  NMR spectrum of poly(PFP-*ter*-VDF-*ter*-TFP) terpolymer (recorded in acetone  $\text{d}_6$ ) (Run 10 in Table 2)

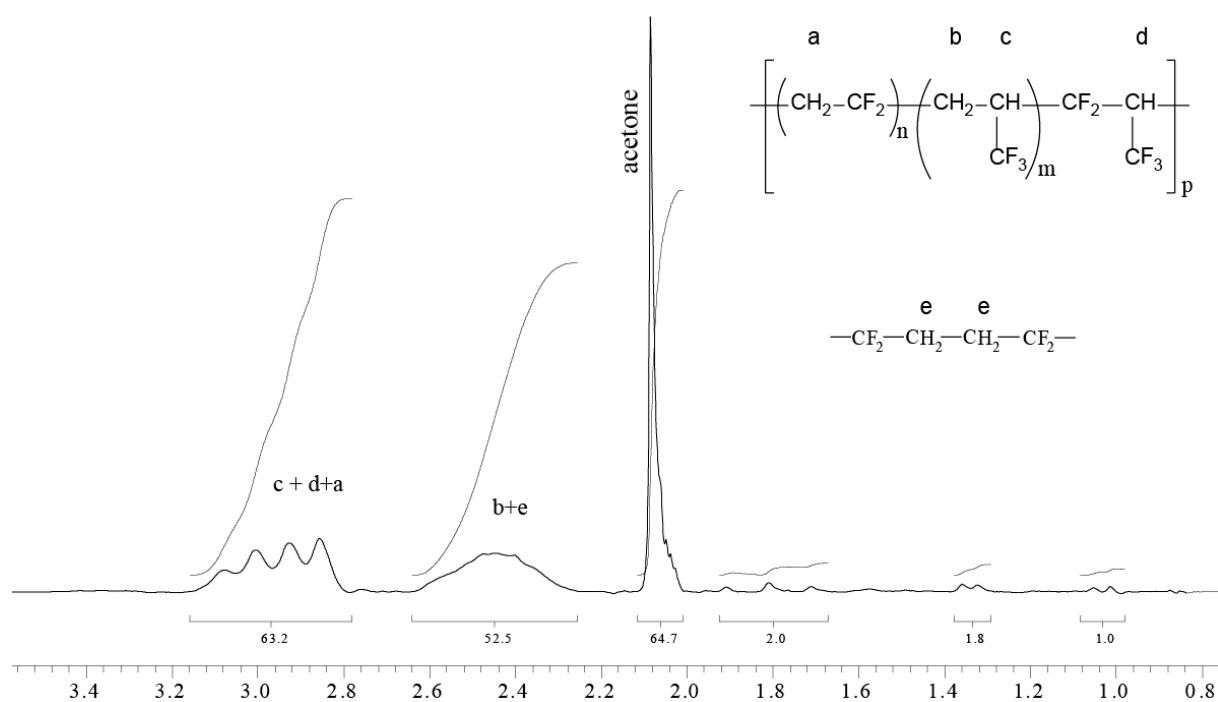

**Figure S19:**  $^1\text{H}$  NMR spectrum of poly(PFP-*ter*-VDF-*ter*-TFP) terpolymer (recorded in acetone  $\text{d}_6$ ) (Run 10 in Table 2)

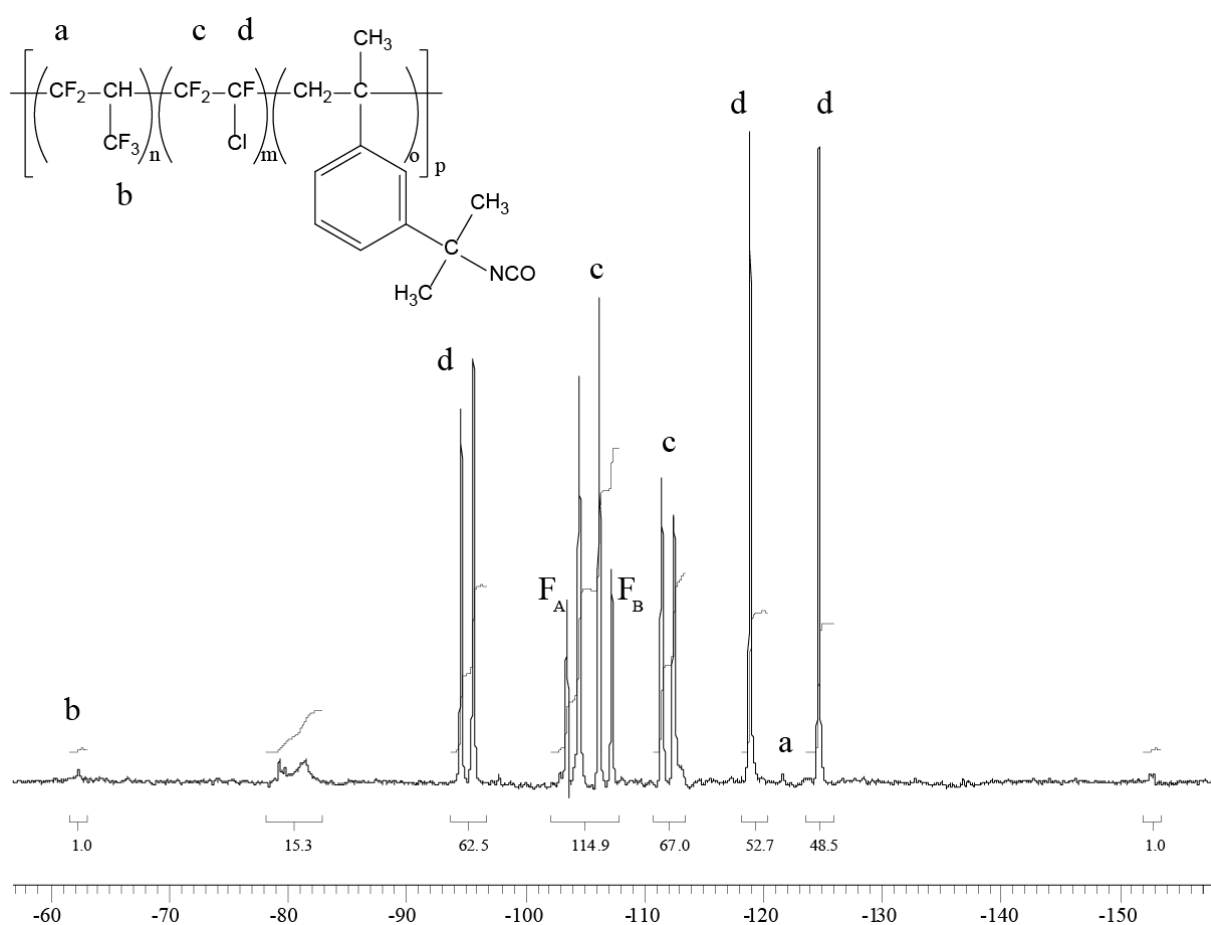

**Figure S20:**  $^{19}\text{F}$  NMR spectrum of poly(PFP-*ter*-CTFE-*ter*-mTMI) terpolymer (recorded in acetone d<sub>6</sub>) (Run 3 in Table 4).

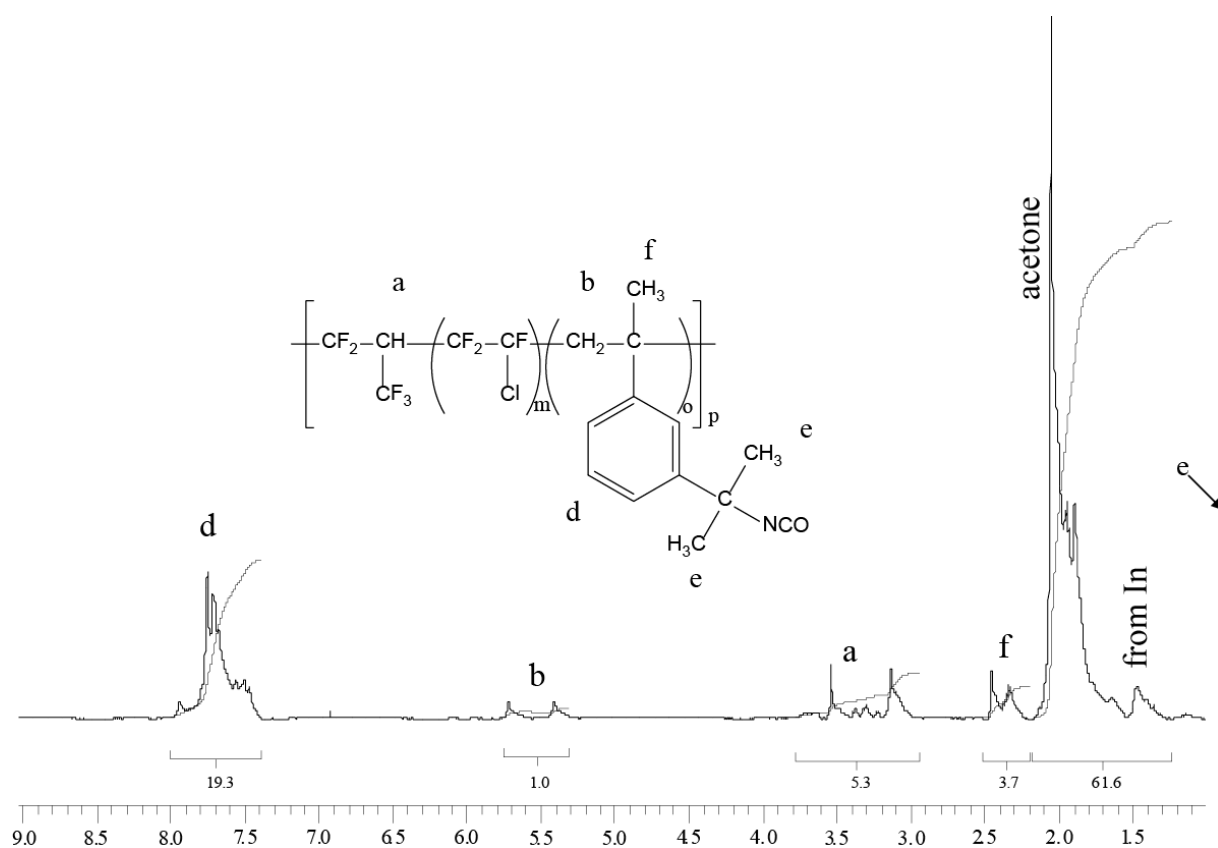

**Figure S21:** expansion of the 0.6 to 4.0 zone in the  $^1\text{H}$  NMR spectrum of poly(PFP-*ter*-CTFE-*ter*-mTMI) terpolymer (recorded in acetone  $\text{d}_6$ ) (Run 3 in Table 4)

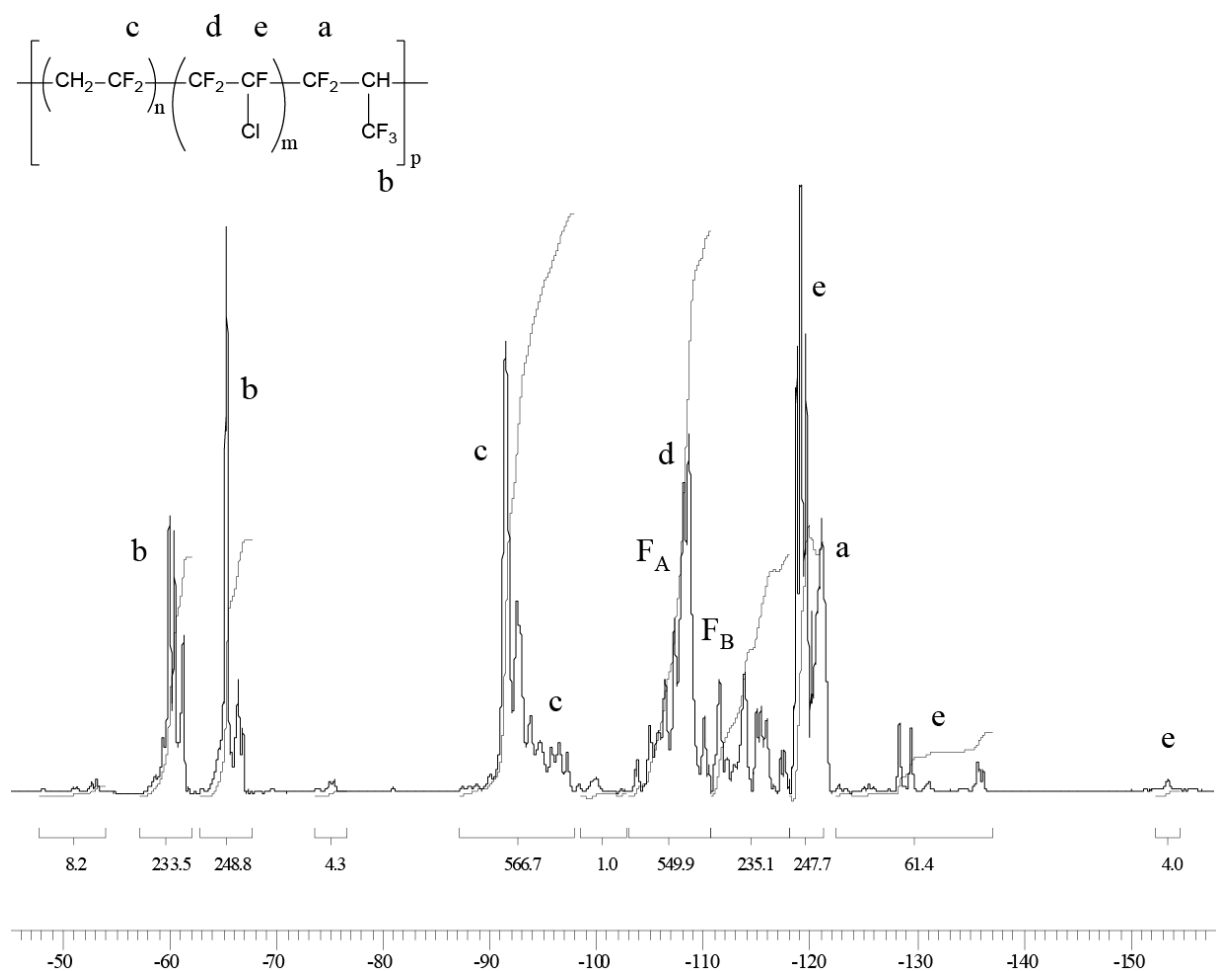

**Figure S22:**  $^{19}\text{F}$  NMR spectrum of poly(PFP-*ter*-CTFE-*ter*-VDF) terpolymer (recorded in acetone  $\text{d}_6$ ) (Run 2 in Table 4)



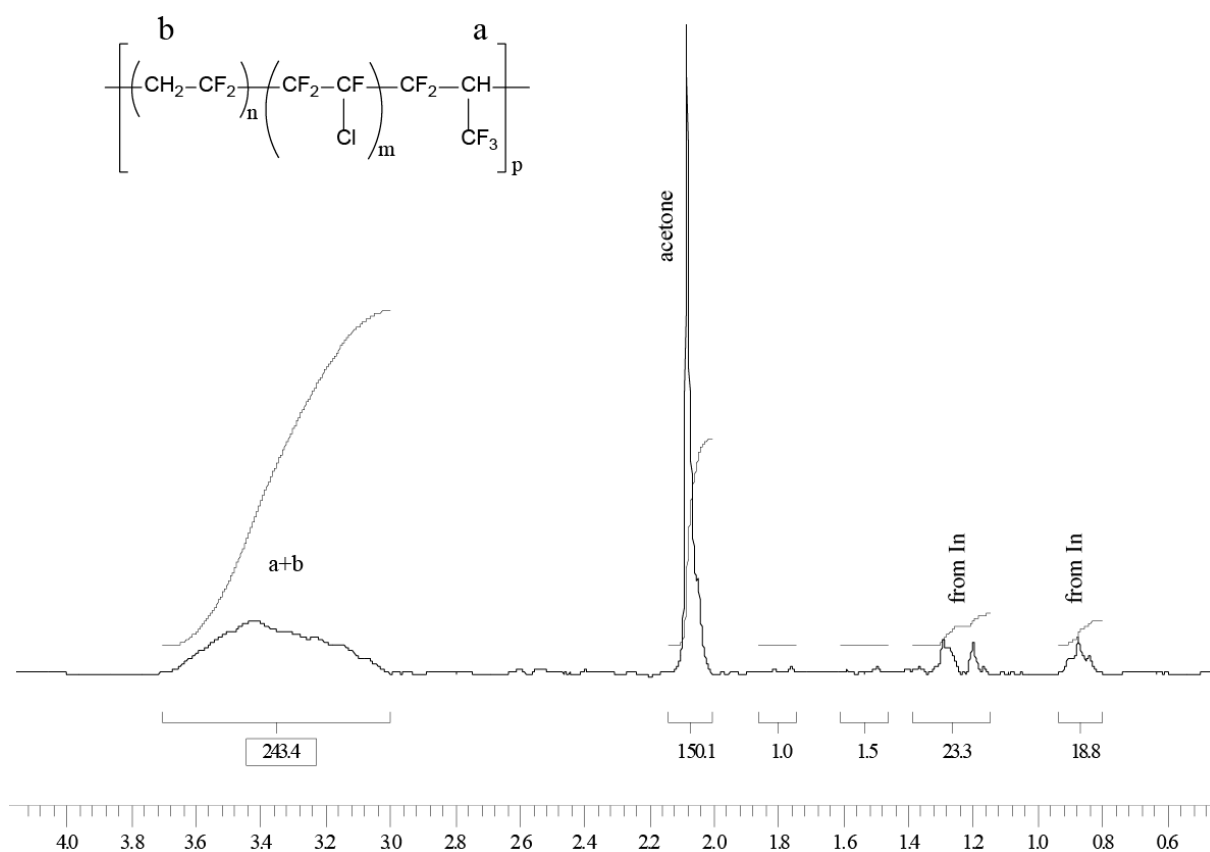

**Figure S23:**  $^1\text{H}$  NMR spectrum of poly(PFP-*ter*-CTFE-*ter*-VDF) terpolymer, recorded in acetone  $\text{d}_6$  (Run 2 in Table 4)

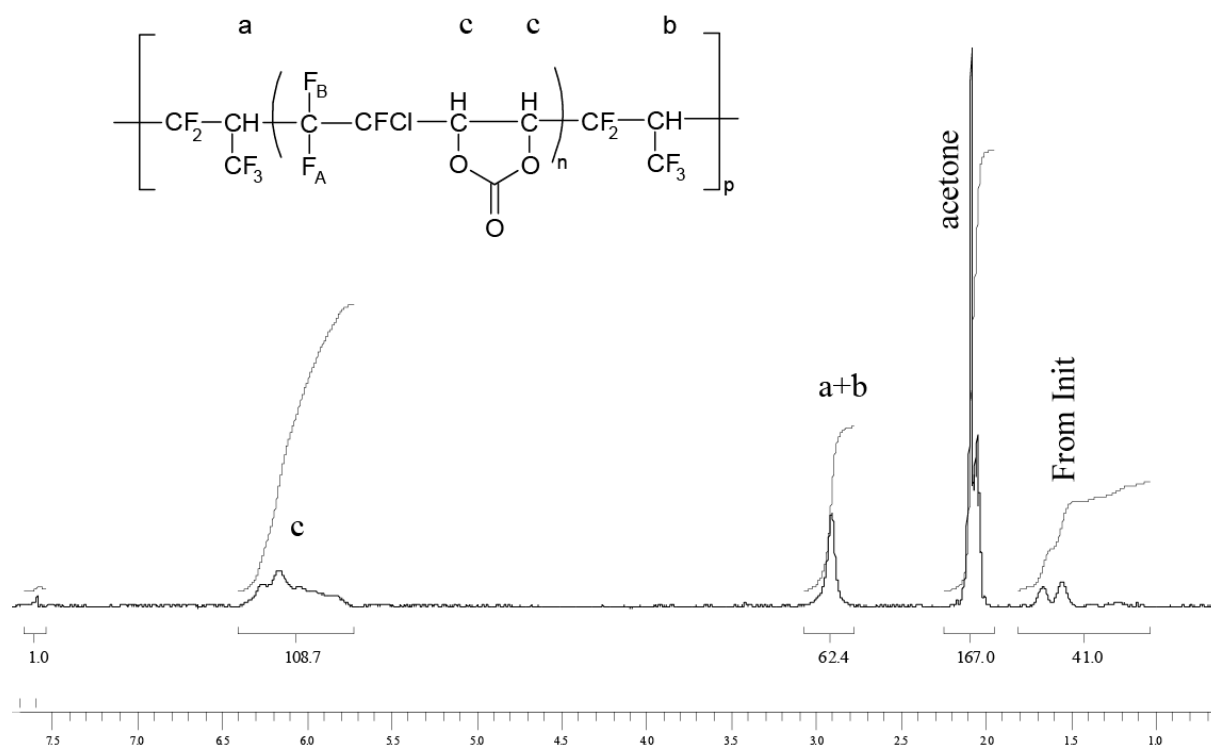

**Figure S24:**  $^1\text{H}$  NMR spectrum of poly(PFP-*ter*-CTFE-*ter*-VCA) terpolymer (recorded in acetone  $\text{d}_6$ ) (Run 4 in Table 4)

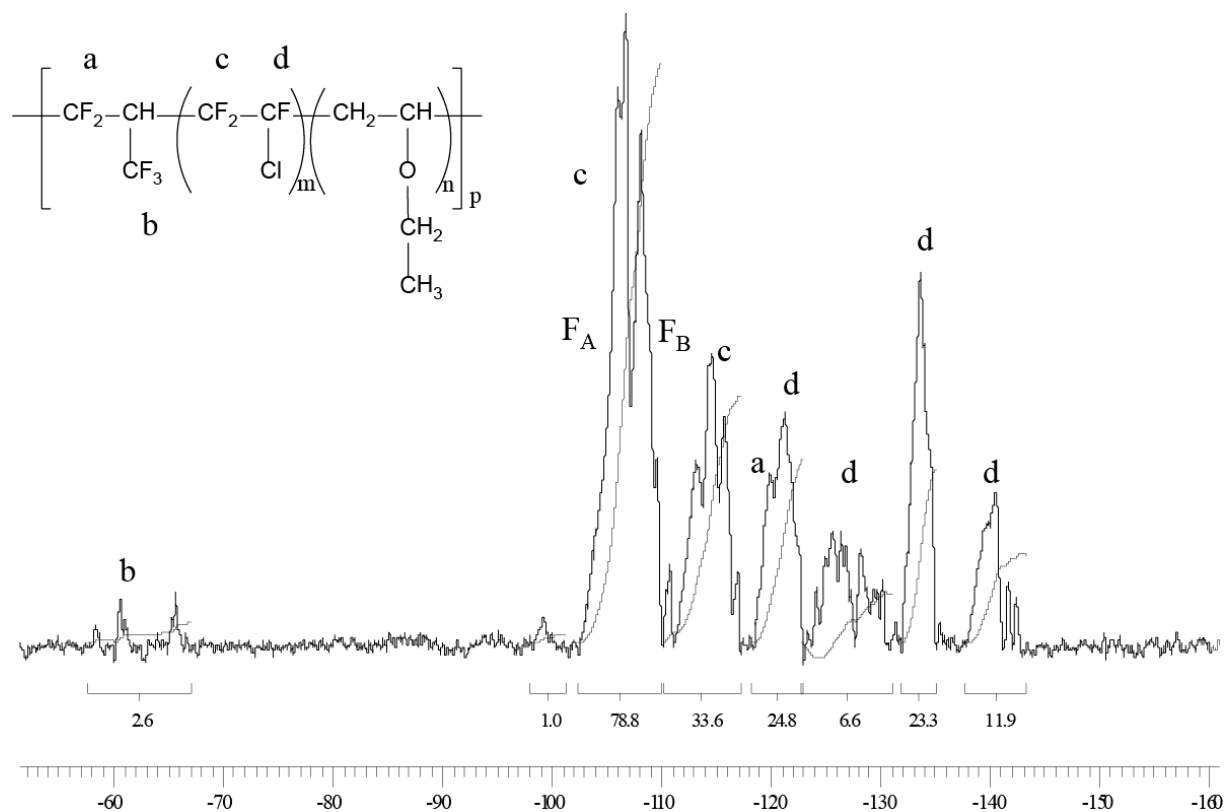

**Figure S25:**  $^{19}\text{F}$  NMR spectrum of poly(PFP-*ter*-CTFE-*ter*-EVE) terpolymer (recorded in acetone  $\text{d}_6$ ) (Run 5 in Table 4)

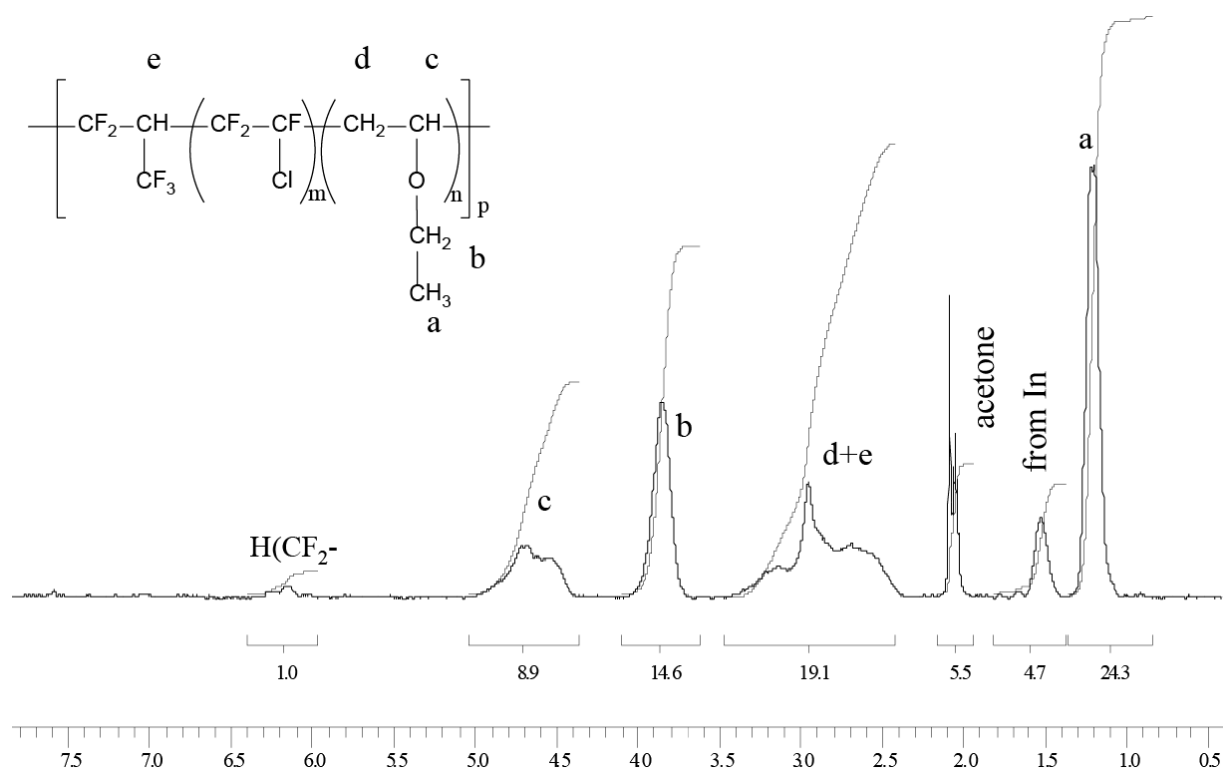

**Figure S26:**  $^1\text{H}$  NMR spectrum of poly(PFP-*ter*-CTFE-*ter*-EVE) terpolymer (recorded in acetone  $\text{d}_6$ ) (Run 5 in Table4)

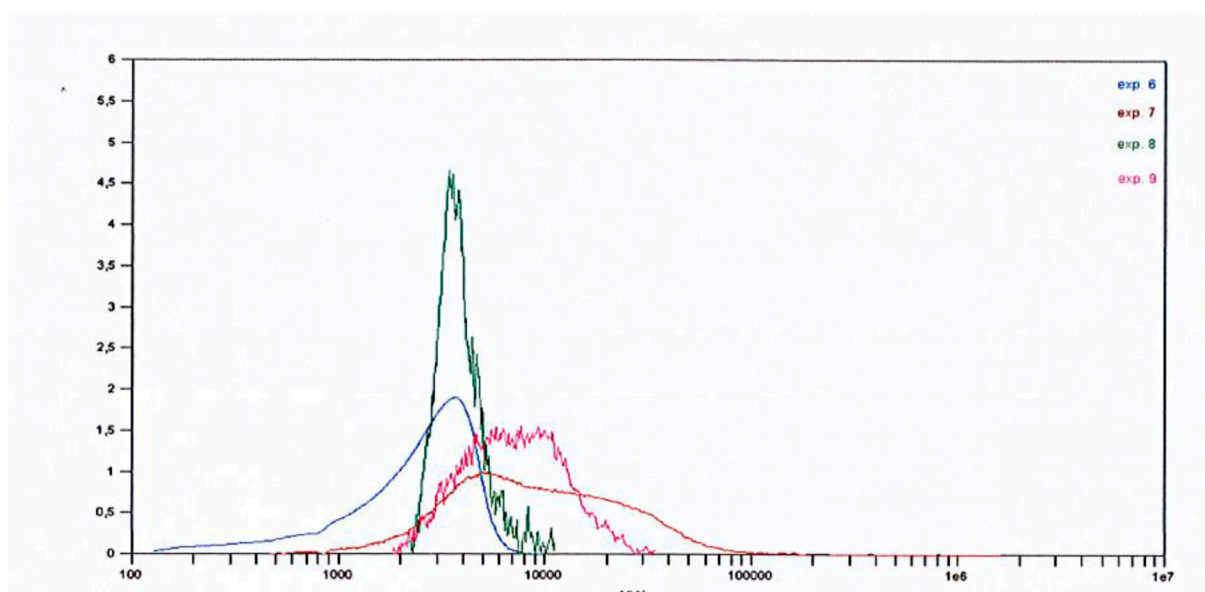

**Figure S27:** GPC chromatograms (Solvent THF, PMMA standards) of poly (PFP-*ter*-VDF-*ter*-MAF-TBE) terpolymers. The run numbers correspond to experiment numbers in Table 3.

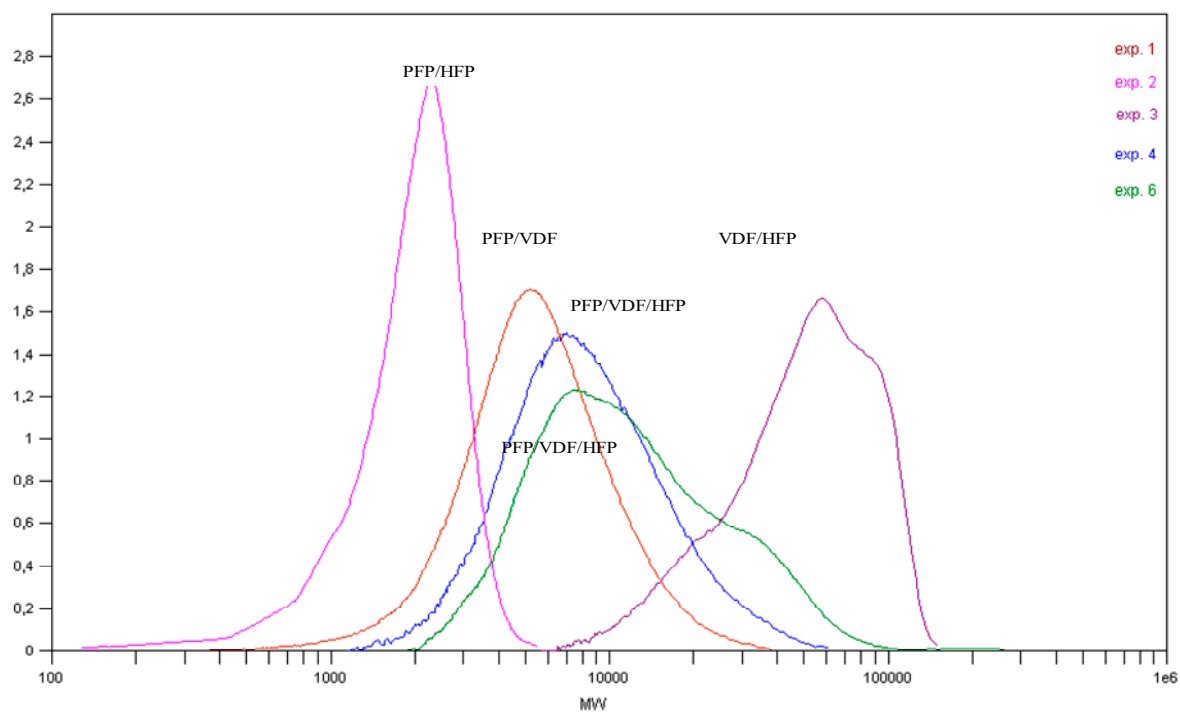

**Figure S28: GPC chromatograms of co- and ter-polymers based on PFP, VDF and HFP**

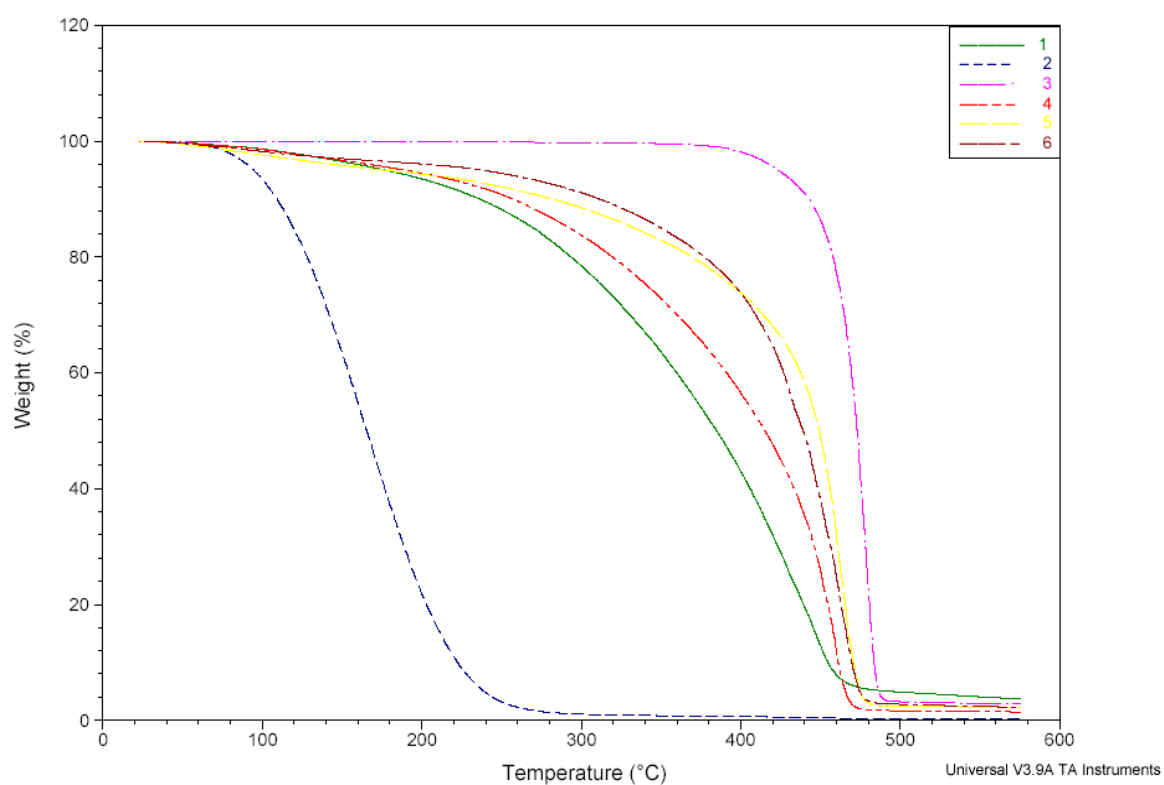

**Figure S29: TGA thermograms under nitrogen of PFP/VDF, PFP/MAF-TBE, VDF/MAF-TBE copolymers. The number of the experiments of the caption corresponds to the number of experiments in Tables 1 and 3.**

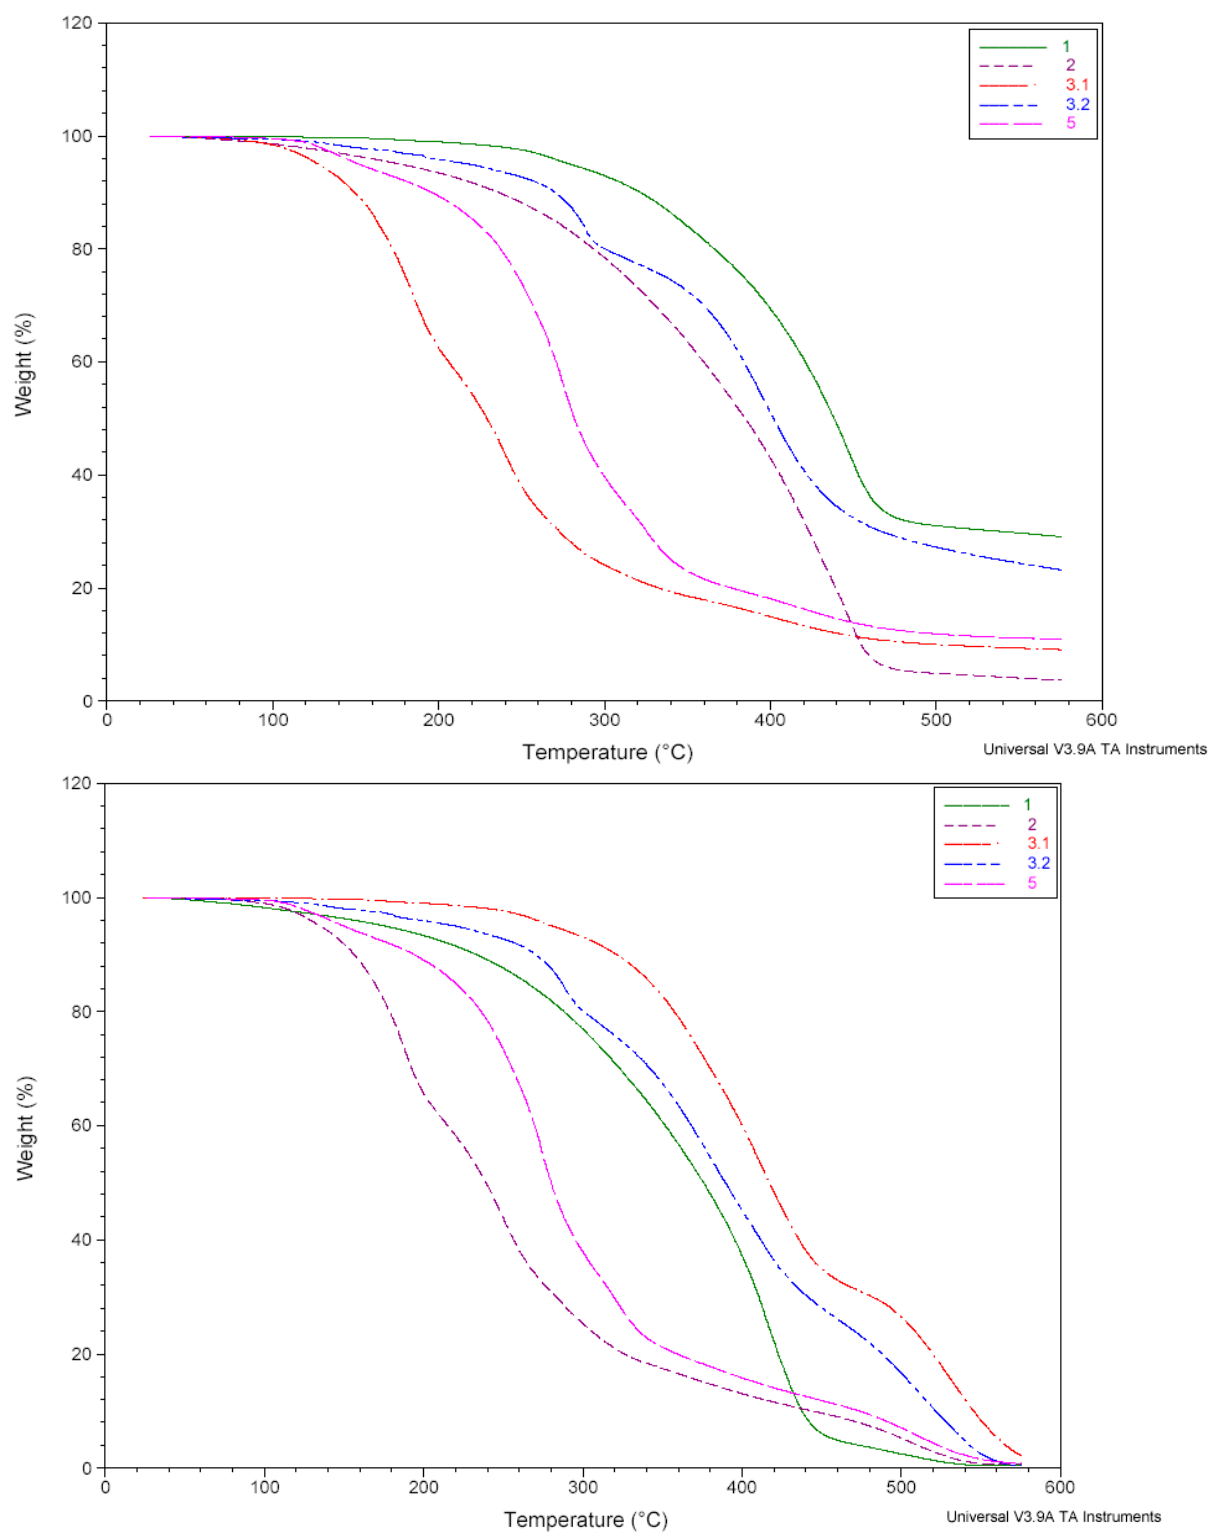

**Figure S30: TGA thermograms under air of poly(PFP-*co*-VDF), poly(PFP-*co*-MAF-TBE), and poly(VDF-*co*-MAF-TBE) copolymers. The number of the experiments of the caption corresponds to the number of experiments in Tables 2-3.**



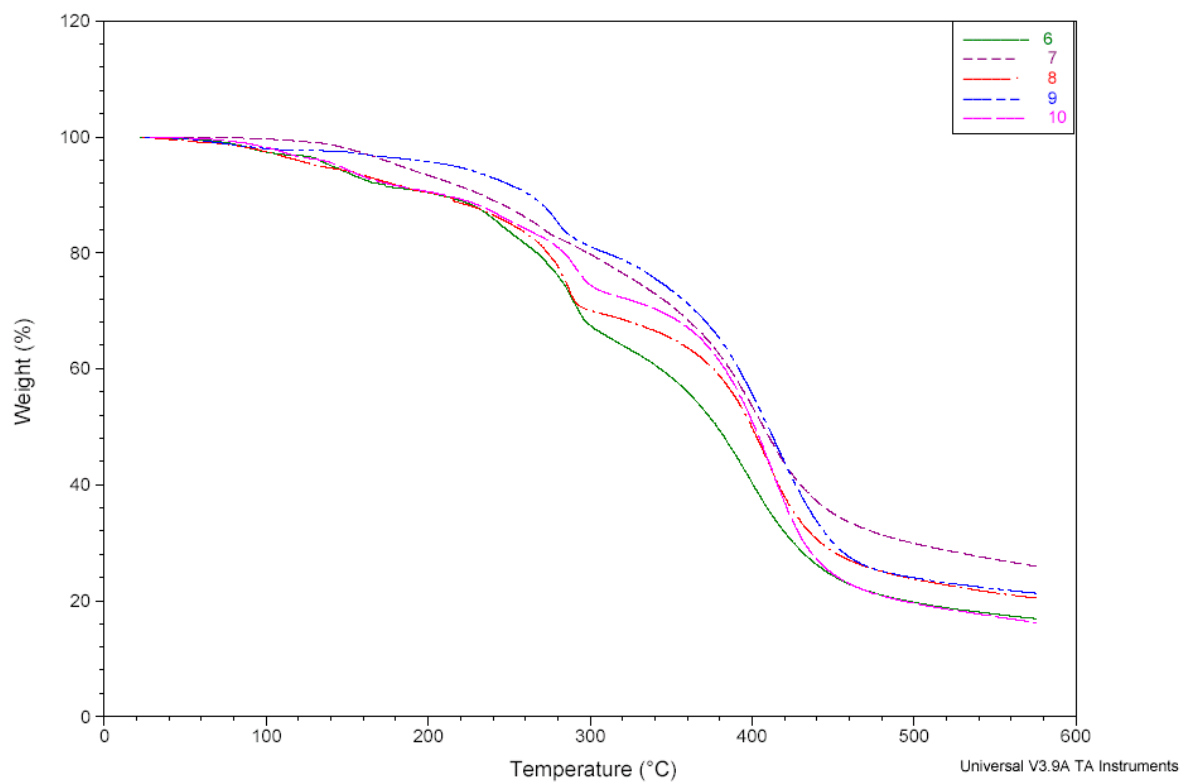

**Figure S31: TGA thermograms under nitrogen of poly(PFP-*ter*-VDF-*ter*-MAF-TBE) terpolymers. The number of the experiments of the caption corresponds to the number of experiments in Tables 1 and 3.**

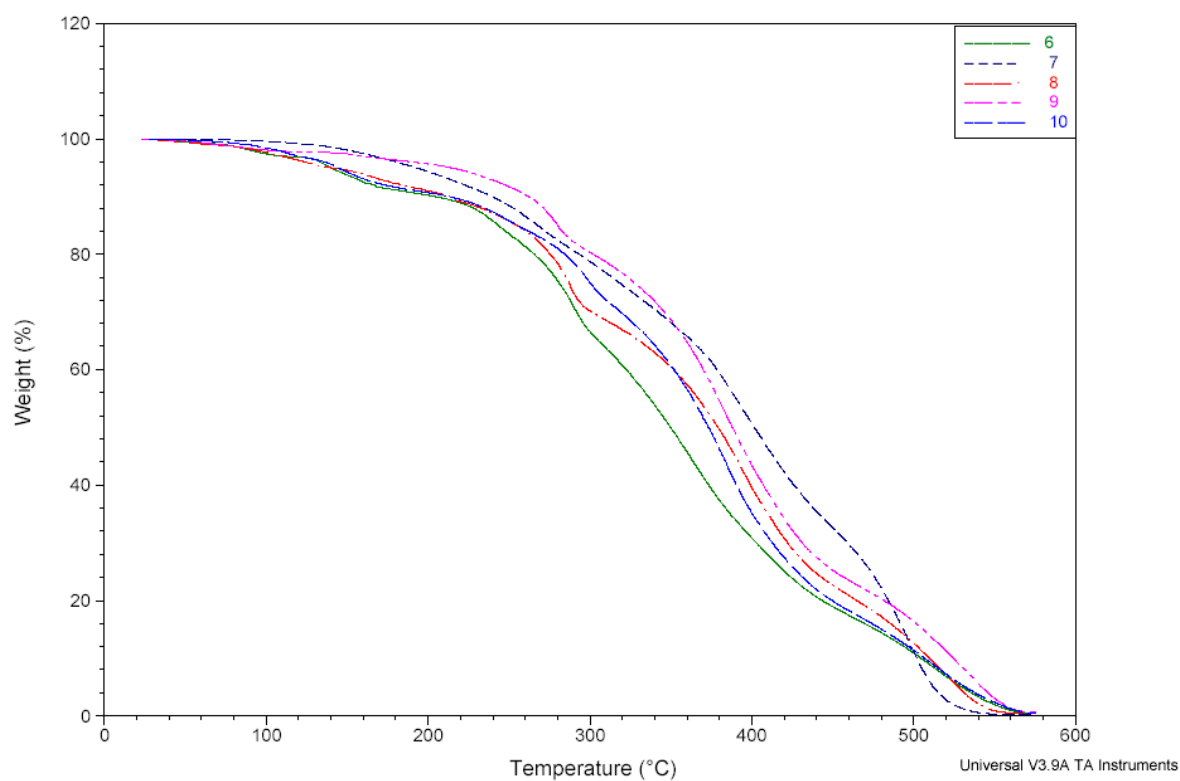

**Figure S32: TGA thermograms under air of poly(PFP-*ter*-VDF-*ter*-MAF-TBE) terpolymers. The number of the experiments of the caption corresponds to the number of experiments in Tables 1 and 3.**

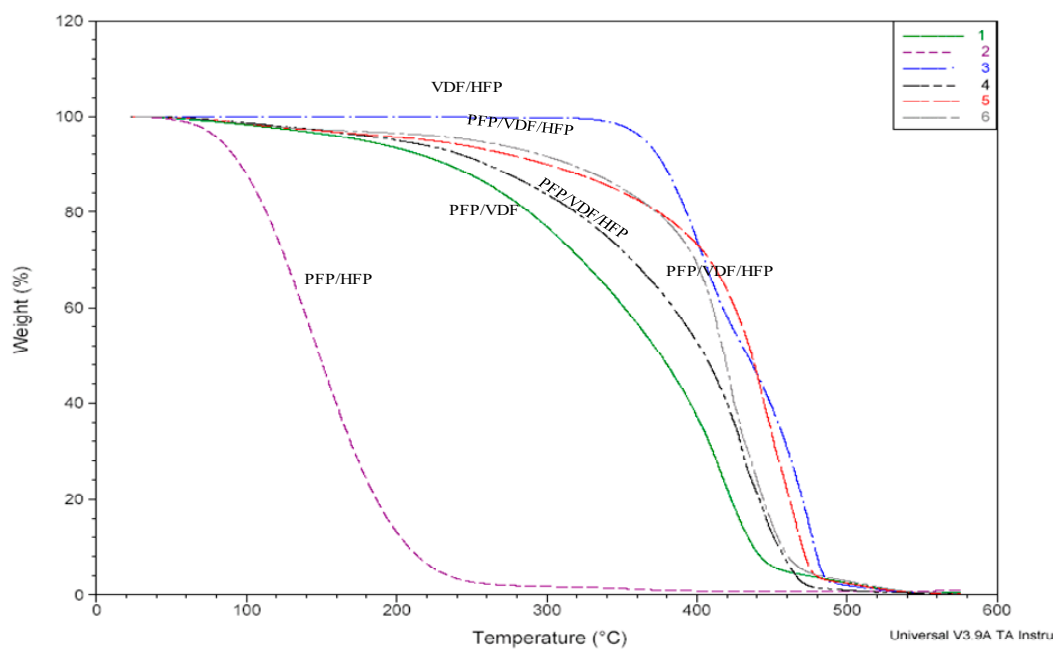

**Figure S33: TGA thermograms under air of poly(PFP-*ter*-VDF-*ter*-HFP) co- and ter-polymers (Table 2).**
